# Supplementary material for: Robust biocatalyst for the green continuous flow synthesis of esters from biomass-derived furfuryl alcohol and C8–C18 carboxylic acids
Source: Royal Society of Chemistry journal article supplement (doi:10.1039/d4gc03821e), 2024-01-01
Supplement: d4gc03821e1.xlsx [file d4gc03821e1.xlsx]

## Sheet: Entry 7 (This work-batch)
	Supplementary Information: Appendix 2				Summary of First Pass Metrics Toolkit
	Yield, AE, RME, MI/PMI and OE
	Reactant (Limiting Reactant First)	Mass (g)	MW	Mol	Catalyst	Mass (g)	Reagent	Mass (g)	Reaction solvent	Volume (cm3)	Density (g ml-1)	Mass (g)	Work up chemical	Mass (g)	Workup solvent	Volume (cm3)	Density (g ml-1)	Mass (g)
	furfuryl alcohol	0.098	98	0.001	MgO-SiO2-C8-LAO	0.15			cyclohexane	0.5	0.779	0.3895	K2CO3	1.38	water	10	1	10
	octanoic acid	0.432	144	0.003									Na2SO4	0.2	heptane	30	0.684	20.52
	Total	0.53	242			0.15		0				0.3895		1.58				30.52
										Flag
								Yield	90.1786	90.1786
								Conversion	90.2041	90.2041
								Selectivity	99.9717	99.9717					Mass	MW	Mol
								AE	92.562				Product		0.202	224	0.000901786
								RME	38.1132	OE	41.1759				mass
								PMI total	164.205				Unreacted limiting reactant		0.0096
								PMI Reaction	5.29455
								PMI reactants, reagents, catlyst	3.36634
								PMI reaction solvents	1.92822
								PMI Workup	158.911
								PMI Workup chemical	7.82178
								PMI workup solvents	151.089
	Solvents (First Pass)							List solvents below
	Preferred solvents		water, EtOH, nBuOH, AcOipr, AcOnBu, PhOMe, MeOH, tBuOH, BnOH, ethylene glycol, acetone, MEK, MIBK, AcOEt, sulfolane					water
	Problematic solvents: (acceptable only if substitution does not offer advantages)		DMSO, cyclohexanone, DMPU, AcOH, Ac2O, Acetonitrile, AcOMe, THF, heptane, Me-cyclohexane, toluene, xylene, MTBE, cyclohexane, chlorobenzene, formic acid, pyridine, Me-THF					cyclohexane, heptane
	Hazardous solvents: These solvents have significant health and/or safety concerns.		dioxane, pentane, TEA, diisopropyl ether, DME, DCM, DMF, DMA, NMP, methoxyethanol, hexane
	Highly hazardous solvents: The solvents which are agreed not to be used, even in screening		Et2O, Benzene, CCl4, chloroform, DCE, nitromethane, CS2, HMPA
	Catalyst/enzyme (First Pass)				Tick						Tick
	Catalyst or enzyme used, or reaction takes place without any catalyst/reagents.			Green Flag	+		Facile recovery of catalyst/enzyme			Green Flag
	Use of stoichiometric quantities of reagents			Amber Flag			catalyst/enzyme not recovered			Amber Flag	+
	Use of reagents in excess			Red Flag
	Critical elements
	Supply remaining	Flag colour	Note element
	5-50 years	Red Flag
	50-500 years	Amber Flag	+
	+500 years	Green Flag
	Energy (First Pass)			Tick						Tick
	Reaction run between 0 to 70oC		Green Flag	+		Reaction run at reflux			Red Flag
	Reaction run between -20 to 0 or 70 to 140oC		Amber Flag			Reaction run 5oC or more below the solvent boiling point			Green Flag	+
	Reaction run below -20 or above 140oC		Red Flag
	Batch/flow			Tick		Work Up				List
	Flow	Green Flag				quenching			Green Flag	filtration of biocatalyst
	Batch	Amber Flag		+		filtration
						centrifugation
						crystallisation
						Low temperature distillation/evaporation/ sublimation (< 140 oC at atmospheric pressure)
						solvent exchange, quenching into aqueous solvent			Amber Flag	extraction with 1M potassium carbonate aqueous solution and heptane
						chromatography/ion exchange			Red Flag
						high temperature distillation/evaporations/sublimation (> 140 oC at atmospheric pressure)
						multiple recrystallisation
								List substances and H-codes		List substances and H-codes		List substances and H-codes
	Health & safety
		Red Flag		Amber Flag		Green Flag		cyclohexane (H225, H304, H315, H336, H400, H410)		furfuryl alcohol (H302, H331, H319, H351, H335, H373)		water
	Highly explosive	H200, H201, H202, H203		H205, H220, H224		If no red or amber flagged H codes present then green flag		heptane (H225, H304, H315, H336, H400, H410)		caprylic acid (H314, H318, H412)		K2CO3 (H315, H319, H335)
	Explosive thermal runaway	H230, H240, H250		H241								Na2SO4
	Toxic	H300, H310, H330		H301, H311, H331,								brine
	Long Term toxicity	H340, H350, H360, H370, H372		H341, H351, H361, H371, H373
	Environmental implications	H400, H410, H411, H420		H401, H412
	Use of chemicals of environmental concern					List substances of very high concern
	Chemical identified as Substances of Very High Concern by ChemSec which are utilised				Red Flag			not applicable

## Sheet: Entry 8 (This work-flow)
	Supplementary Information: Appendix 2				Summary of First Pass Metrics Toolkit
	Yield, AE, RME, MI/PMI and OE
	Reactant (Limiting Reactant First)	Mass (g)	MW	Mol	Catalyst	Mass (g)	Reagent	Mass (g)	Reaction solvent	Volume (cm3)	Density (g ml-1)	Mass (g)	Work up chemical	Mass (g)	Workup solvent	Volume (cm3)	Density (g ml-1)	Mass (g)
	furfuryl alcohol	18.63	98	0.190102	MgO-SiO2-C8-LAO	0.3			cyclohexane	95	0.779	74.005	K2CO3	1.38	water	10	1	10
	octanoic acid	82.11	144	0.570208									Na2SO4	0.2	heptane	30	0.684	20.52
	Total	100.74	242			0.3		0				74.005		1.58				30.52
										Flag
								Yield	96.7995	96.7995
								Conversion	96.8009	96.8009
								Selectivity	99.9986	99.9986					Mass	MW	Mol
								AE	92.562				Product		41.22	224	0.184018
								RME	40.9172	OE	44.2052				mass
								PMI total	5.02535				Unreacted limiting reactant		0.596
								PMI Reaction	4.2466
								PMI reactants, reagents, catlyst	2.45124
								PMI reaction solvents	1.79537
								PMI Workup	0.778748
								PMI Workup chemical	0.0383309
								PMI workup solvents	0.740417
	Solvents (First Pass)							List solvents below
	Preferred solvents		water, EtOH, nBuOH, AcOipr, AcOnBu, PhOMe, MeOH, tBuOH, BnOH, ethylene glycol, acetone, MEK, MIBK, AcOEt, sulfolane					water
	Problematic solvents: (acceptable only if substitution does not offer advantages)		DMSO, cyclohexanone, DMPU, AcOH, Ac2O, Acetonitrile, AcOMe, THF, heptane, Me-cyclohexane, toluene, xylene, MTBE, cyclohexane, chlorobenzene, formic acid, pyridine, Me-THF					cyclohexane, heptane
	Hazardous solvents: These solvents have significant health and/or safety concerns.		dioxane, pentane, TEA, diisopropyl ether, DME, DCM, DMF, DMA, NMP, methoxyethanol, hexane
	Highly hazardous solvents: The solvents which are agreed not to be used, even in screening		Et2O, Benzene, CCl4, chloroform, DCE, nitromethane, CS2, HMPA
	Catalyst/enzyme (First Pass)				Tick						Tick
	Catalyst or enzyme used, or reaction takes place without any catalyst/reagents.			Green Flag	+		Facile recovery of catalyst/enzyme			Green Flag
	Use of stoichiometric quantities of reagents			Amber Flag			catalyst/enzyme not recovered			Amber Flag	+
	Use of reagents in excess			Red Flag
	Critical elements
	Supply remaining	Flag colour	Note element
	5-50 years	Red Flag
	50-500 years	Amber Flag	+
	+500 years	Green Flag
	Energy (First Pass)			Tick						Tick
	Reaction run between 0 to 70oC		Green Flag	+		Reaction run at reflux			Red Flag
	Reaction run between -20 to 0 or 70 to 140oC		Amber Flag			Reaction run 5oC or more below the solvent boiling point			Green Flag	+
	Reaction run below -20 or above 140oC		Red Flag
	Batch/flow			Tick		Work Up				List
	Flow	Green Flag		+		quenching			Green Flag
	Batch	Amber Flag				filtration
						centrifugation
						crystallisation
						Low temperature distillation/evaporation/ sublimation (< 140 oC at atmospheric pressure)
						solvent exchange, quenching into aqueous solvent			Amber Flag	extraction with 1M potassium carbonate aqueous solution and heptane
						chromatography/ion exchange			Red Flag
						high temperature distillation/evaporations/sublimation (> 140 oC at atmospheric pressure)
						multiple recrystallisation
								List substances and H-codes		List substances and H-codes		List substances and H-codes
	Health & safety
		Red Flag		Amber Flag		Green Flag		cyclohexane (H225, H304, H315, H336, H400, H410)		furfuryl alcohol (H302, H331, H319, H351, H335, H373)		water
	Highly explosive	H200, H201, H202, H203		H205, H220, H224		If no red or amber flagged H codes present then green flag		heptane (H225, H304, H315, H336, H400, H410)		caprylic acid (H314, H318, H412)		K2CO3 (H315, H319, H335)
	Explosive thermal runaway	H230, H240, H250		H241								Na2SO4
	Toxic	H300, H310, H330		H301, H311, H331,								brine
	Long Term toxicity	H340, H350, H360, H370, H372		H341, H351, H361, H371, H373
	Environmental implications	H400, H410, H411, H420		H401, H412
	Use of chemicals of environmental concern					List substances of very high concern
	Chemical identified as Substances of Very High Concern by ChemSec which are utilised				Red Flag			not applicable

## Sheet: Entry 1 (kumar2002)
	Supplementary Information: Appendix 2				Summary of First Pass Metrics Toolkit
	Yield, AE, RME, MI/PMI and OE
	Reactant (Limiting Reactant First)	Mass (g)	MW	Mol	Catalyst	Mass (g)	Reagent	Mass (g)	Reaction solvent	Volume (cm3)	Density (g ml-1)	Mass (g)	Work up chemical	Mass (g)	Workup solvent	Volume (cm3)	Density (g ml-1)	Mass (g)
	furfuryl alcohol	0.98	98	0.01	Y2O3-ZrO2	0.196							NaHCO3	no data	water	15	1	15
	acetic acid	3	60	0.05									Na2SO4	no data	dichloromethane	40	1.33	53.2
													NaCl	no data	ethyl acetate				no data
															petroleum ether				no data		FA	C2	FA_C8
																					10 mmol	50 mmol	8,8 mmol
																					98	60	140
																					0.98	3
	Total	3.98	158			0.196		0				0		0				68.2
										Flag
								Yield	88	88
								Conversion	88	88
								Selectivity	100	100					Mass	MW	Mol
								AE	88.6076				Product		1.232	140	0.0088
								RME	30.9548	OE	34.9347				mass
								PMI total	58.7468				Unreacted limiting reactant		0.1176
								PMI Reaction	3.38961
								PMI reactants, reagents, catlyst	3.38961
								PMI reaction solvents	0
								PMI Workup	55.3571
								PMI Workup chemical	0
								PMI workup solvents	55.3571
	Solvents (First Pass)							List solvents below
	Preferred solvents		water, EtOH, nBuOH, AcOipr, AcOnBu, PhOMe, MeOH, tBuOH, BnOH, ethylene glycol, acetone, MEK, MIBK, AcOEt, sulfolane					water, AcOEt
	Problematic solvents: (acceptable only if substitution does not offer advantages)		DMSO, cyclohexanone, DMPU, AcOH, Ac2O, Acetonitrile, AcOMe, THF, heptane, Me-cyclohexane, toluene, xylene, MTBE, cyclohexane, chlorobenzene, formic acid, pyridine, Me-THF					petroleum ether
	Hazardous solvents: These solvents have significant health and/or safety concerns.		dioxane, pentane, TEA, diisopropyl ether, DME, DCM, DMF, DMA, NMP, methoxyethanol, hexane					DCM
	Highly hazardous solvents: The solvents which are agreed not to be used, even in screening		Et2O, Benzene, CCl4, chloroform, DCE, nitromethane, CS2, HMPA
	Catalyst/enzyme (First Pass)				Tick						Tick
	Catalyst or enzyme used, or reaction takes place without any catalyst/reagents.			Green Flag	+		Facile recovery of catalyst/enzyme			Green Flag	+	in high temperature (500 °C)
	Use of stoichiometric quantities of reagents			Amber Flag			catalyst/enzyme not recovered			Amber Flag
	Use of reagents in excess			Red Flag
	Critical elements
	Supply remaining	Flag colour	Note element
	5-50 years	Red Flag
	50-500 years	Amber Flag	+
	+500 years	Green Flag
	Energy (First Pass)			Tick						Tick
	Reaction run between 0 to 70oC		Green Flag			Reaction run at reflux			Red Flag
	Reaction run between -20 to 0 or 70 to 140oC		Amber Flag	+		Reaction run 5oC or more below the solvent boiling point			Green Flag	+
	Reaction run below -20 or above 140oC		Red Flag
	Batch/flow			Tick		Work Up				List
	Flow	Green Flag				quenching			Green Flag	filtration of catalyst
	Batch	Amber Flag		+		filtration
						centrifugation
						crystallisation
						Low temperature distillation/evaporation/ sublimation (< 140 oC at atmospheric pressure)
						solvent exchange, quenching into aqueous solvent			Amber Flag	diluted with water, extracted with CH2Cl2, washed with 10% aqueous NaHCO3, brine, water and dried over Na2SO4
						chromatography/ion exchange			Red Flag	column chromatography: 3% EtOAc in light petroleum ether
						high temperature distillation/evaporations/sublimation (> 140 oC at atmospheric pressure)
						multiple recrystallisation
								List substances and H-codes		List substances and H-codes		List substances and H-codes
	Health & safety
		Red Flag		Amber Flag		Green Flag		petroleum ether (H225 H304 H315 H336 H411)		furfuryl alcohol (H302, H331, H319, H351, H335, H373)		water
	Highly explosive	H200, H201, H202, H203		H205, H220, H224		If no red or amber flagged H codes present then green flag						NaHCO3
	Explosive thermal runaway	H230, H240, H250		H241								Na2SO4
	Toxic	H300, H310, H330		H301, H311, H331,								acetic acid (H226, H314)
	Long Term toxicity	H340, H350, H360, H370, H372		H341, H351, H361, H371, H373								ethyl acetate (H225 H319 H336)
	Environmental implications	H400, H410, H411, H420		H401, H412
	Use of chemicals of environmental concern					List substances of very high concern
	Chemical identified as Substances of Very High Concern by ChemSec which are utilised				Red Flag			not applicable

## Sheet: Entry 2 (Yadav2019)
	Supplementary Information: Appendix 2				Summary of First Pass Metrics Toolkit
	Yield, AE, RME, MI/PMI and OE
	Reactant (Limiting Reactant First)	Mass (g)	MW	Mol	Catalyst	Mass (g)	Reagent	Mass (g)	Reaction solvent	Volume (cm3)	Density (g ml-1)	Mass (g)	Work up chemical	Mass (g)	Workup solvent	Volume (cm3)	Density (g ml-1)	Mass (g)
	acetic acid	1.68	60	0.028	Fe-DTP-ZIF-8	0.006
	furfuryl alcohol	4.508	98	0.046
	Total	6.188	158			0.006		0				0		0				0
										Flag
								Yield	75.6888	75.6888
								Conversion	87.6786	87.6786
								Selectivity	86.3253	86.3253					Mass	MW	Mol
								AE	88.6076				Product		2.967	140	0.0211929
								RME	47.9476	OE	54.1123				mass
								PMI total	2.08763				Unreacted limiting reactant		0.207
								PMI Reaction	2.08763
								PMI reactants, reagents, catlyst	2.08763
								PMI reaction solvents	0
								PMI Workup	0
								PMI Workup chemical	0
								PMI workup solvents	0
	Solvents (First Pass)							List solvents below
	Preferred solvents		water, EtOH, nBuOH, AcOipr, AcOnBu, PhOMe, MeOH, tBuOH, BnOH, ethylene glycol, acetone, MEK, MIBK, AcOEt, sulfolane
	Problematic solvents: (acceptable only if substitution does not offer advantages)		DMSO, cyclohexanone, DMPU, AcOH, Ac2O, Acetonitrile, AcOMe, THF, heptane, Me-cyclohexane, toluene, xylene, MTBE, cyclohexane, chlorobenzene, formic acid, pyridine, Me-THF							no data
	Hazardous solvents: These solvents have significant health and/or safety concerns.		dioxane, pentane, TEA, diisopropyl ether, DME, DCM, DMF, DMA, NMP, methoxyethanol, hexane
	Highly hazardous solvents: The solvents which are agreed not to be used, even in screening		Et2O, Benzene, CCl4, chloroform, DCE, nitromethane, CS2, HMPA
	Catalyst/enzyme (First Pass)				Tick						Tick
	Catalyst or enzyme used, or reaction takes place without any catalyst/reagents.			Green Flag	+		Facile recovery of catalyst/enzyme			Green Flag
	Use of stoichiometric quantities of reagents			Amber Flag			catalyst/enzyme not recovered			Amber Flag	+
	Use of reagents in excess			Red Flag
	Critical elements
	Supply remaining	Flag colour	Note element
	5-50 years	Red Flag	+
	50-500 years	Amber Flag
	+500 years	Green Flag
	Energy (First Pass)			Tick						Tick
	Reaction run between 0 to 70oC		Green Flag			Reaction run at reflux			Red Flag
	Reaction run between -20 to 0 or 70 to 140oC		Amber Flag	+		Reaction run 5oC or more below the solvent boiling point			Green Flag	+
	Reaction run below -20 or above 140oC		Red Flag
	Batch/flow			Tick		Work Up				List
	Flow	Green Flag				quenching			Green Flag
	Batch	Amber Flag		+		filtration
						centrifugation
						crystallisation					no data
						Low temperature distillation/evaporation/ sublimation (< 140 oC at atmospheric pressure)
						solvent exchange, quenching into aqueous solvent			Amber Flag
						chromatography/ion exchange			Red Flag
						high temperature distillation/evaporations/sublimation (> 140 oC at atmospheric pressure)
						multiple recrystallisation
								List substances and H-codes		List substances and H-codes		List substances and H-codes
	Health & safety
		Red Flag		Amber Flag		Green Flag				furfuryl alcohol (H302, H331, H319, H351, H335, H373)		acetic acid (H226, H314)
	Highly explosive	H200, H201, H202, H203		H205, H220, H224		If no red or amber flagged H codes present then green flag
	Explosive thermal runaway	H230, H240, H250		H241
	Toxic	H300, H310, H330		H301, H311, H331,
	Long Term toxicity	H340, H350, H360, H370, H372		H341, H351, H361, H371, H373
	Environmental implications	H400, H410, H411, H420		H401, H412
	Use of chemicals of environmental concern					List substances of very high concern
	Chemical identified as Substances of Very High Concern by ChemSec which are utilised				Red Flag			not applicable

## Sheet: Entry 3 (Ghosh2012)
	Supplementary Information: Appendix 2				Summary of First Pass Metrics Toolkit
	Yield, AE, RME, MI/PMI and OE
	Reactant (Limiting Reactant First)	Mass (g)	MW	Mol	Catalyst	Mass (g)	Reagent	Mass (g)	Reaction solvent	Volume (cm3)	Density (g ml-1)	Mass (g)	Work up chemical	Mass (g)	Workup solvent	Volume (cm3)	Density (g ml-1)	Mass (g)
	oleic acid	20	282.5	0.0707965	Novozyme 435	1									no data
	furfuryl alcohol	6.958	98	0.071
	Total	26.958	380.5			1		0				0		0				0
										Flag
								Yield	99.8998	99.8998
								Conversion	99.866	99.866
								Selectivity	100.034	100.034					Mass	MW	Mol
								AE	95.2694				Product		25.638	362.5	0.0707255
								RME	95.1035	OE	99.8259				mass
								PMI total	1.09049				Unreacted limiting reactant		0.0268
								PMI Reaction	1.09049
								PMI reactants, reagents, catlyst	1.09049
								PMI reaction solvents	0
								PMI Workup	0
								PMI Workup chemical	0
								PMI workup solvents	0
	Solvents (First Pass)							List solvents below
	Preferred solvents		water, EtOH, nBuOH, AcOipr, AcOnBu, PhOMe, MeOH, tBuOH, BnOH, ethylene glycol, acetone, MEK, MIBK, AcOEt, sulfolane
	Problematic solvents: (acceptable only if substitution does not offer advantages)		DMSO, cyclohexanone, DMPU, AcOH, Ac2O, Acetonitrile, AcOMe, THF, heptane, Me-cyclohexane, toluene, xylene, MTBE, cyclohexane, chlorobenzene, formic acid, pyridine, Me-THF							no data
	Hazardous solvents: These solvents have significant health and/or safety concerns.		dioxane, pentane, TEA, diisopropyl ether, DME, DCM, DMF, DMA, NMP, methoxyethanol, hexane
	Highly hazardous solvents: The solvents which are agreed not to be used, even in screening		Et2O, Benzene, CCl4, chloroform, DCE, nitromethane, CS2, HMPA
	Catalyst/enzyme (First Pass)				Tick						Tick
	Catalyst or enzyme used, or reaction takes place without any catalyst/reagents.			Green Flag	+		Facile recovery of catalyst/enzyme			Green Flag
	Use of stoichiometric quantities of reagents			Amber Flag			catalyst/enzyme not recovered			Amber Flag		no data
	Use of reagents in excess			Red Flag
	Critical elements
	Supply remaining	Flag colour	Note element
	5-50 years	Red Flag
	50-500 years	Amber Flag
	+500 years	Green Flag	+
	Energy (First Pass)			Tick						Tick
	Reaction run between 0 to 70oC		Green Flag	+		Reaction run at reflux			Red Flag
	Reaction run between -20 to 0 or 70 to 140oC		Amber Flag			Reaction run 5oC or more below the solvent boiling point			Green Flag	+
	Reaction run below -20 or above 140oC		Red Flag
	Batch/flow			Tick		Work Up				List
	Flow	Green Flag				quenching			Green Flag
	Batch	Amber Flag		+		filtration
						centrifugation
						crystallisation
						Low temperature distillation/evaporation/ sublimation (< 140 oC at atmospheric pressure)
						solvent exchange, quenching into aqueous solvent			Amber Flag		no data
						chromatography/ion exchange			Red Flag
						high temperature distillation/evaporations/sublimation (> 140 oC at atmospheric pressure)
						multiple recrystallisation
								List substances and H-codes		List substances and H-codes		List substances and H-codes
	Health & safety
		Red Flag		Amber Flag		Green Flag				furfuryl alcohol (H302, H331, H319, H351, H335, H373)		oleic acid
	Highly explosive	H200, H201, H202, H203		H205, H220, H224		If no red or amber flagged H codes present then green flag
	Explosive thermal runaway	H230, H240, H250		H241
	Toxic	H300, H310, H330		H301, H311, H331,
	Long Term toxicity	H340, H350, H360, H370, H372		H341, H351, H361, H371, H373
	Environmental implications	H400, H410, H411, H420		H401, H412
	Use of chemicals of environmental concern					List substances of very high concern
	Chemical identified as Substances of Very High Concern by ChemSec which are utilised				Red Flag			not applicable

## Sheet: Entry 4 (Hecke2017)
	Supplementary Information: Appendix 2				Summary of First Pass Metrics Toolkit
	Yield, AE, RME, MI/PMI and OE
	Reactant (Limiting Reactant First)	Mass (g)	MW	Mol	Catalyst	Mass (g)	Reagent	Mass (g)	Reaction solvent	Volume (cm3)	Density (g ml-1)	Mass (g)	Work up chemical	Mass (g)	Workup solvent	Volume (cm3)	Density (g ml-1)	Mass (g)
	furfuryl alcohol	0.098	98	0.001	Novozyme 435	0.005
	octanoic acid	0.14	144	0.000972222
	Total	0.238	242			0.005		0				0		0				0
										Flag
								Yield	73	73
								Conversion	73	73
								Selectivity	100	100					Mass	MW	Mol
								AE	92.562				Product		0.16352	224	0.00073
								RME	68.7059	OE	74.2269				mass
								PMI total	1.48606				Unreacted limiting reactant		0.02646
								PMI Reaction	1.48606
								PMI reactants, reagents, catlyst	1.48606
								PMI reaction solvents	0
								PMI Workup	0
								PMI Workup chemical	0
								PMI workup solvents	0
	Solvents (First Pass)							List solvents below
	Preferred solvents		water, EtOH, nBuOH, AcOipr, AcOnBu, PhOMe, MeOH, tBuOH, BnOH, ethylene glycol, acetone, MEK, MIBK, AcOEt, sulfolane
	Problematic solvents: (acceptable only if substitution does not offer advantages)		DMSO, cyclohexanone, DMPU, AcOH, Ac2O, Acetonitrile, AcOMe, THF, heptane, Me-cyclohexane, toluene, xylene, MTBE, cyclohexane, chlorobenzene, formic acid, pyridine, Me-THF
	Hazardous solvents: These solvents have significant health and/or safety concerns.		dioxane, pentane, TEA, diisopropyl ether, DME, DCM, DMF, DMA, NMP, methoxyethanol, hexane							no data
	Highly hazardous solvents: The solvents which are agreed not to be used, even in screening		Et2O, Benzene, CCl4, chloroform, DCE, nitromethane, CS2, HMPA
	Catalyst/enzyme (First Pass)				Tick						Tick
	Catalyst or enzyme used, or reaction takes place without any catalyst/reagents.			Green Flag	+		Facile recovery of catalyst/enzyme			Green Flag
	Use of stoichiometric quantities of reagents			Amber Flag			catalyst/enzyme not recovered			Amber Flag		no data
	Use of reagents in excess			Red Flag
	Critical elements
	Supply remaining	Flag colour	Note element
	5-50 years	Red Flag
	50-500 years	Amber Flag
	+500 years	Green Flag	+
	Energy (First Pass)			Tick						Tick
	Reaction run between 0 to 70oC		Green Flag	+		Reaction run at reflux			Red Flag
	Reaction run between -20 to 0 or 70 to 140oC		Amber Flag			Reaction run 5oC or more below the solvent boiling point			Green Flag	+
	Reaction run below -20 or above 140oC		Red Flag
	Batch/flow			Tick		Work Up				List
	Flow	Green Flag				quenching			Green Flag
	Batch	Amber Flag		+		filtration
						centrifugation
						crystallisation
						Low temperature distillation/evaporation/ sublimation (< 140 oC at atmospheric pressure)
						solvent exchange, quenching into aqueous solvent			Amber Flag		no data
						chromatography/ion exchange			Red Flag
						high temperature distillation/evaporations/sublimation (> 140 oC at atmospheric pressure)
						multiple recrystallisation
								List substances and H-codes		List substances and H-codes		List substances and H-codes
	Health & safety
		Red Flag		Amber Flag		Green Flag				furfuryl alcohol (H302, H331, H319, H351, H335, H373)
	Highly explosive	H200, H201, H202, H203		H205, H220, H224		If no red or amber flagged H codes present then green flag				caprylic acid (H314, H318, H412)
	Explosive thermal runaway	H230, H240, H250		H241
	Toxic	H300, H310, H330		H301, H311, H331,
	Long Term toxicity	H340, H350, H360, H370, H372		H341, H351, H361, H371, H373
	Environmental implications	H400, H410, H411, H420		H401, H412
	Use of chemicals of environmental concern					List substances of very high concern
	Chemical identified as Substances of Very High Concern by ChemSec which are utilised				Red Flag			not applicable

## Sheet: Entry 5 (Ghosh 2016)
	Supplementary Information: Appendix 2				Summary of First Pass Metrics Toolkit
	Yield, AE, RME, MI/PMI and OE
	Reactant (Limiting Reactant First)	Mass (g)	MW	Mol	Catalyst	Mass (g)	Reagent	Mass (g)	Reaction solvent	Volume (cm3)	Density (g ml-1)	Mass (g)	Work up chemical	Mass (g)	Workup solvent	Volume (cm3)	Density (g ml-1)	Mass (g)
	ricinoleic acid	0.3	298.5	0.00100503	Novozyme 435	0.06
	furfuryl alcohol	0.3	98	0.00306122
	Total	0.6	396.5			0.06		0				0		0				0
										Flag
								Yield	88.5511	88.5511
								Conversion	88.5667	88.5667
								Selectivity	99.9824	99.9824					Mass	MW	Mol
								AE	95.4603				Product		0.33685	378.5	0.00088996
								RME	56.1417	OE	58.8115				mass
								PMI total	1.95933				Unreacted limiting reactant		0.0343
								PMI Reaction	1.95933
								PMI reactants, reagents, catlyst	1.95933
								PMI reaction solvents	0
								PMI Workup	0
								PMI Workup chemical	0
								PMI workup solvents	0
	Solvents (First Pass)							List solvents below
	Preferred solvents		water, EtOH, nBuOH, AcOipr, AcOnBu, PhOMe, MeOH, tBuOH, BnOH, ethylene glycol, acetone, MEK, MIBK, AcOEt, sulfolane
	Problematic solvents: (acceptable only if substitution does not offer advantages)		DMSO, cyclohexanone, DMPU, AcOH, Ac2O, Acetonitrile, AcOMe, THF, heptane, Me-cyclohexane, toluene, xylene, MTBE, cyclohexane, chlorobenzene, formic acid, pyridine, Me-THF							no data
	Hazardous solvents: These solvents have significant health and/or safety concerns.		dioxane, pentane, TEA, diisopropyl ether, DME, DCM, DMF, DMA, NMP, methoxyethanol, hexane
	Highly hazardous solvents: The solvents which are agreed not to be used, even in screening		Et2O, Benzene, CCl4, chloroform, DCE, nitromethane, CS2, HMPA
	Catalyst/enzyme (First Pass)				Tick						Tick
	Catalyst or enzyme used, or reaction takes place without any catalyst/reagents.			Green Flag	+		Facile recovery of catalyst/enzyme			Green Flag
	Use of stoichiometric quantities of reagents			Amber Flag			catalyst/enzyme not recovered			Amber Flag		no data
	Use of reagents in excess			Red Flag
	Critical elements
	Supply remaining	Flag colour	Note element
	5-50 years	Red Flag
	50-500 years	Amber Flag
	+500 years	Green Flag	+
	Energy (First Pass)			Tick						Tick
	Reaction run between 0 to 70oC		Green Flag	+		Reaction run at reflux			Red Flag
	Reaction run between -20 to 0 or 70 to 140oC		Amber Flag			Reaction run 5oC or more below the solvent boiling point			Green Flag	+
	Reaction run below -20 or above 140oC		Red Flag
	Batch/flow			Tick		Work Up				List
	Flow	Green Flag				quenching			Green Flag
	Batch	Amber Flag		+		filtration
						centrifugation
						crystallisation
						Low temperature distillation/evaporation/ sublimation (< 140 oC at atmospheric pressure)
						solvent exchange, quenching into aqueous solvent			Amber Flag		no data
						chromatography/ion exchange			Red Flag
						high temperature distillation/evaporations/sublimation (> 140 oC at atmospheric pressure)
						multiple recrystallisation
								List substances and H-codes		List substances and H-codes		List substances and H-codes
	Health & safety
		Red Flag		Amber Flag		Green Flag				furfuryl alcohol (H302, H331, H319, H351, H335, H373)		ricinoleic acid
	Highly explosive	H200, H201, H202, H203		H205, H220, H224		If no red or amber flagged H codes present then green flag
	Explosive thermal runaway	H230, H240, H250		H241
	Toxic	H300, H310, H330		H301, H311, H331,
	Long Term toxicity	H340, H350, H360, H370, H372		H341, H351, H361, H371, H373
	Environmental implications	H400, H410, H411, H420		H401, H412
	Use of chemicals of environmental concern					List substances of very high concern
	Chemical identified as Substances of Very High Concern by ChemSec which are utilised				Red Flag			not applicable

## Sheet: Entry 6 (Kolesinska 2021)
	Supplementary Information: Appendix 2				Summary of First Pass Metrics Toolkit
	Yield, AE, RME, MI/PMI and OE
	Reactant (Limiting Reactant First)	Mass (g)	MW	Mol	Catalyst	Mass (g)	Reagent	Mass (g)	Reaction solvent	Volume (cm3)	Density (g ml-1)	Mass (g)	Work up chemical	Mass (g)	Workup solvent	Volume (cm3)	Density (g ml-1)	Mass (g)
	furfuryl alcohol	0.196	98	0.002			EDC	0.94	dichloromethane	3	1.33	3.99	NaOH	0.4	water	15	1	15
	2-furoic acid	0.672	112	0.006									MgSO4		dichloromethane	50	1.33	66.5
													HCl	0.365	hexane				no data
															ethyl acetate				no data
	Total	0.868	210			0		0.94				3.99		0.765				81.5
										Flag
								Yield	70.8333	70.8333
								Conversion	70.8163	70.8163
								Selectivity	100.024	100.024					Mass	MW	Mol
								AE	91.4286				Product		0.272	192	0.00141667
								RME	31.3364	OE	34.2742				mass
								PMI total	323.761				Unreacted limiting reactant		0.0572
								PMI Reaction	21.3162
								PMI reactants, reagents, catlyst	6.64706
								PMI reaction solvents	14.6691
								PMI Workup	302.445
								PMI Workup chemical	2.8125
								PMI workup solvents	299.632
	Solvents (First Pass)							List solvents below
	Preferred solvents		water, EtOH, nBuOH, AcOipr, AcOnBu, PhOMe, MeOH, tBuOH, BnOH, ethylene glycol, acetone, MEK, MIBK, AcOEt, sulfolane					water, AcOEt
	Problematic solvents: (acceptable only if substitution does not offer advantages)		DMSO, cyclohexanone, DMPU, AcOH, Ac2O, Acetonitrile, AcOMe, THF, heptane, Me-cyclohexane, toluene, xylene, MTBE, cyclohexane, chlorobenzene, formic acid, pyridine, Me-THF
	Hazardous solvents: These solvents have significant health and/or safety concerns.		dioxane, pentane, TEA, diisopropyl ether, DME, DCM, DMF, DMA, NMP, methoxyethanol, hexane					DCM, hexane
	Highly hazardous solvents: The solvents which are agreed not to be used, even in screening		Et2O, Benzene, CCl4, chloroform, DCE, nitromethane, CS2, HMPA
	Catalyst/enzyme (First Pass)				Tick						Tick
	Catalyst or enzyme used, or reaction takes place without any catalyst/reagents.			Green Flag			Facile recovery of catalyst/enzyme			Green Flag
	Use of stoichiometric quantities of reagents			Amber Flag			catalyst/enzyme not recovered			Amber Flag
	Use of reagents in excess			Red Flag	+
	Critical elements
	Supply remaining	Flag colour	Note element
	5-50 years	Red Flag
	50-500 years	Amber Flag
	+500 years	Green Flag	+
	Energy (First Pass)			Tick						Tick
	Reaction run between 0 to 70oC		Green Flag			Reaction run at reflux			Red Flag	+
	Reaction run between -20 to 0 or 70 to 140oC		Amber Flag	+		Reaction run 5oC or more below the solvent boiling point			Green Flag
	Reaction run below -20 or above 140oC		Red Flag
	Batch/flow			Tick		Work Up				List
	Flow	Green Flag				quenching			Green Flag
	Batch	Amber Flag		+		filtration
						centrifugation
						crystallisation
						Low temperature distillation/evaporation/ sublimation (< 140 oC at atmospheric pressure)
						solvent exchange, quenching into aqueous solvent			Amber Flag	extraction: DCM (50 mL), washed with H2O (5mL), 1N HCl (2x5mL), H2O (5mL), 1M NaOH (2x5mL), and H2O (5mL), dried under anhydrous MgSO4.
						chromatography/ion exchange			Red Flag	Product was purified by flash chromatography (hexane/ethyl acetate 10:1)
						high temperature distillation/evaporations/sublimation (> 140 oC at atmospheric pressure)
						multiple recrystallisation
								List substances and H-codes		List substances and H-codes		List substances and H-codes
	Health & safety
		Red Flag		Amber Flag		Green Flag				furfuryl alcohol (H302, H331, H319, H351, H335, H373)		water
	Highly explosive	H200, H201, H202, H203		H205, H220, H224		If no red or amber flagged H codes present then green flag		EDC (H302 H311 H315 H317 H319 H373 H410)		dichloromethane (H315 H319 H336 H351 H373)		NaOH (H290, H314)
	Explosive thermal runaway	H230, H240, H250		H241								MgSO4
	Toxic	H300, H310, H330		H301, H311, H331,								ethyl acetate (H225 H319 H336)
	Long Term toxicity	H340, H350, H360, H370, H372		H341, H351, H361, H371, H373								2-furoic acid (H315, H319, H335)
	Environmental implications	H400, H410, H411, H420		H401, H412								HCl (37%) (H290, H314, H335)
	Use of chemicals of environmental concern					List substances of very high concern
	Chemical identified as Substances of Very High Concern by ChemSec which are utilised				Red Flag			not applicable
