# Supplementary material for: Robust biocatalyst for the green continuous flow synthesis of esters from biomass-derived furfuryl alcohol and C8–C18 carboxylic acids
Source: Royal Society of Chemistry journal article supplement (doi:10.1039/d4gc03821e), 2024-01-01
Supplement: d4gc03821e2.pdf [file d4gc03821e2.pdf]

Electronic Supplementary Information (ESI)

**Robust biocatalyst for the green continuous flow synthesis of esters from biomass-derived furfuryl alcohol and C<sub>8</sub>-C<sub>18</sub> carboxylic acids**

*Anna Wolny,<sup>a</sup> Dagmara Więclawik,<sup>a</sup> Jakub Zdarta,<sup>b</sup> Sebastian Jurczyk,<sup>c</sup> Teofil Jesionowski,<sup>b</sup>  
Anna Chrobok<sup>a\*</sup>*

*<sup>a</sup> Department of Chemical Organic Technology and Petrochemistry, Faculty of Chemistry,  
Silesian University of Technology, Krzywoustego 4, PL-44100 Gliwice, Poland,  
anna.chrobok@polsl.pl*

*<sup>b</sup> Institute of Chemical Technology and Engineering, Faculty of Chemical Technology, Poznan  
University of Technology, Berdychowo 4, PL-60965 Poznan, Poland,  
teofil.jesionowski@put.poznan.pl*

*<sup>c</sup> Institute for Engineering of Polymer Materials and Dyes, Lukasiewicz Research Network,  
Sklodowskiej-Curie 55, PL-87100 Torun, Poland*

## Space-time-yield (STY) for batch process

$$STY = m_{\text{product}} / t_{\text{reaction time}} V_{\text{biocatalyst}} \text{ (gh}^{-1}\text{L}^{-1}\text{)}$$

$$STY = 0.0884\text{g} / 0.75\text{h} \cdot 0.000368\text{L} = 320.7 \text{ (gh}^{-1}\text{L}^{-1}\text{)}$$

## Specific productivity (SP) for batch process

$$SP = m_{\text{product}} / t_{\text{reaction time}} m_{\text{protein}} \text{ (gh}^{-1}\text{mg}^{-1}\text{)}$$

$$SP = 0.0884\text{g} / 0.75\text{h} \cdot 6.36\text{mg} = 0.019 \text{ (gh}^{-1}\text{mg}^{-1}\text{)}$$

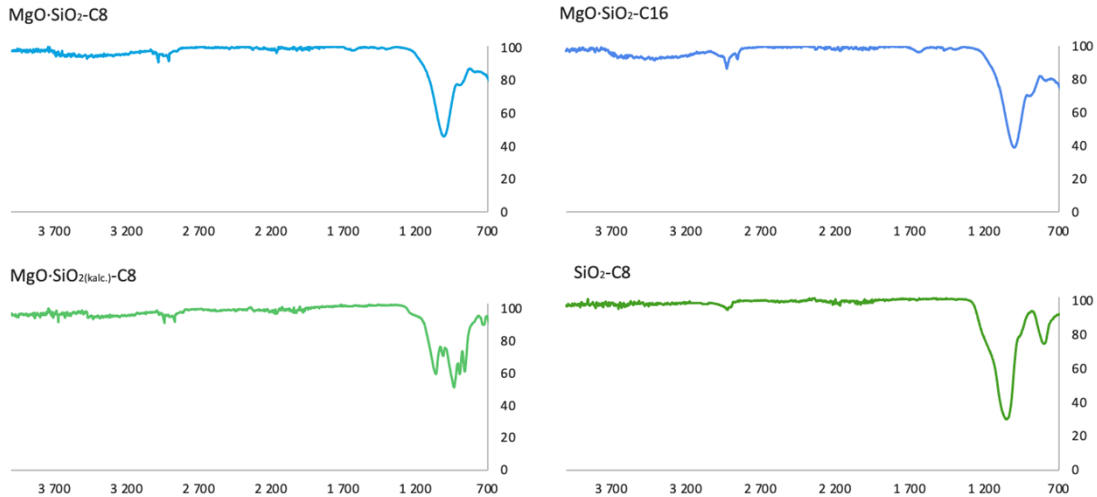

**Fig. S1.** FT-IR analysis of  $\text{MgO} \cdot \text{SiO}_2\text{-C}_8$ ,  $\text{MgO} \cdot \text{SiO}_2\text{-C}_{16}$ ,  $\text{MgO} \cdot \text{SiO}_2\text{-C}_8(\text{calc.})$ ,  $\text{SiO}_2\text{-C}_8$ .

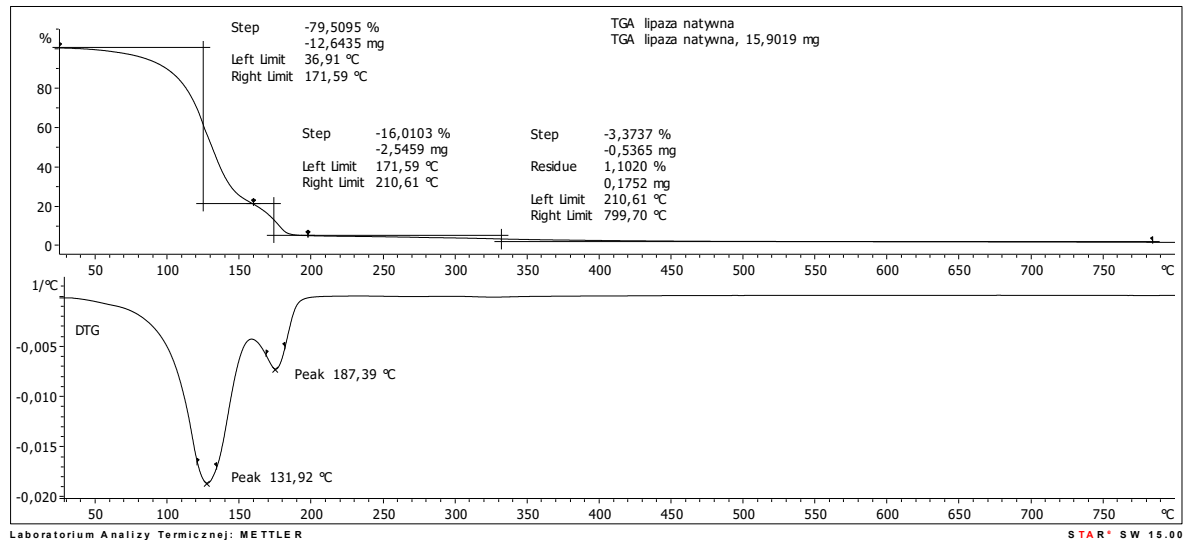

**Fig. S2. TG/DTG analysis of LAO.**

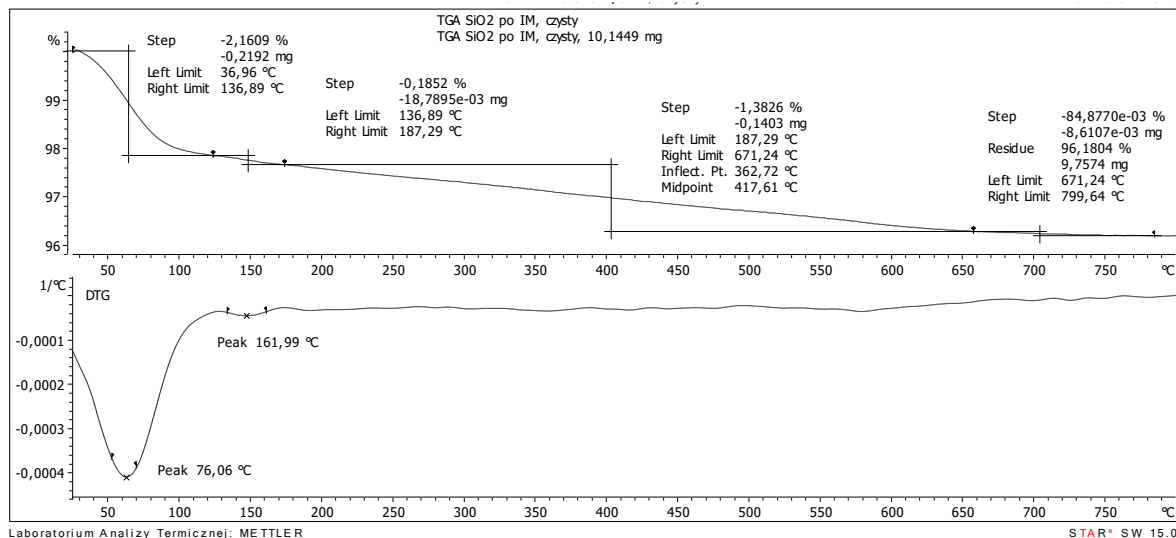

**Fig. S3. TG/DTG analysis of SiO<sub>2</sub>.**

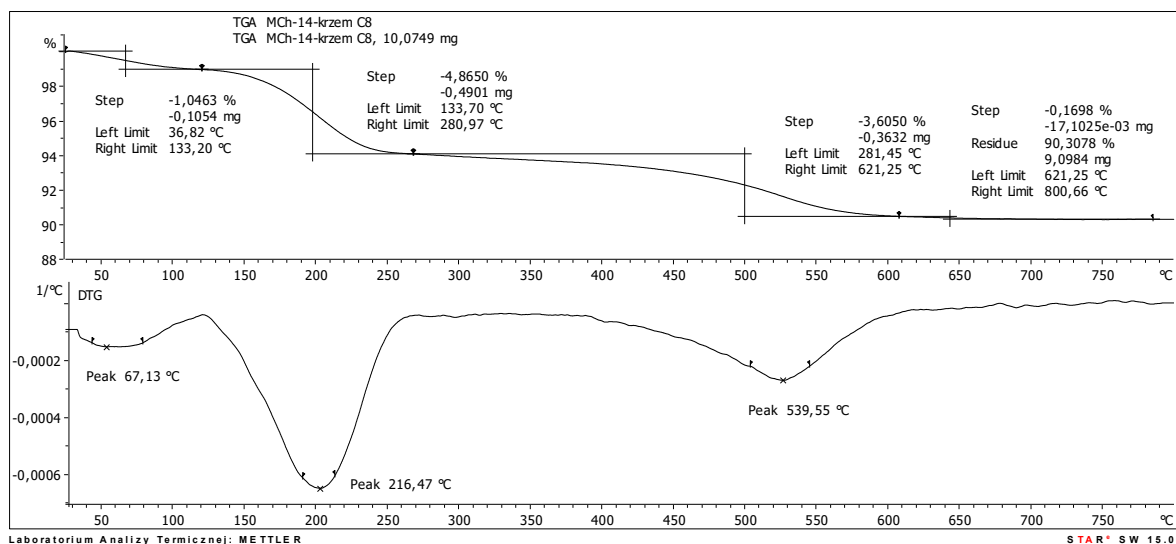

**Fig. S4. TG/DTG analysis of SiO<sub>2</sub>-C<sub>8</sub>.**

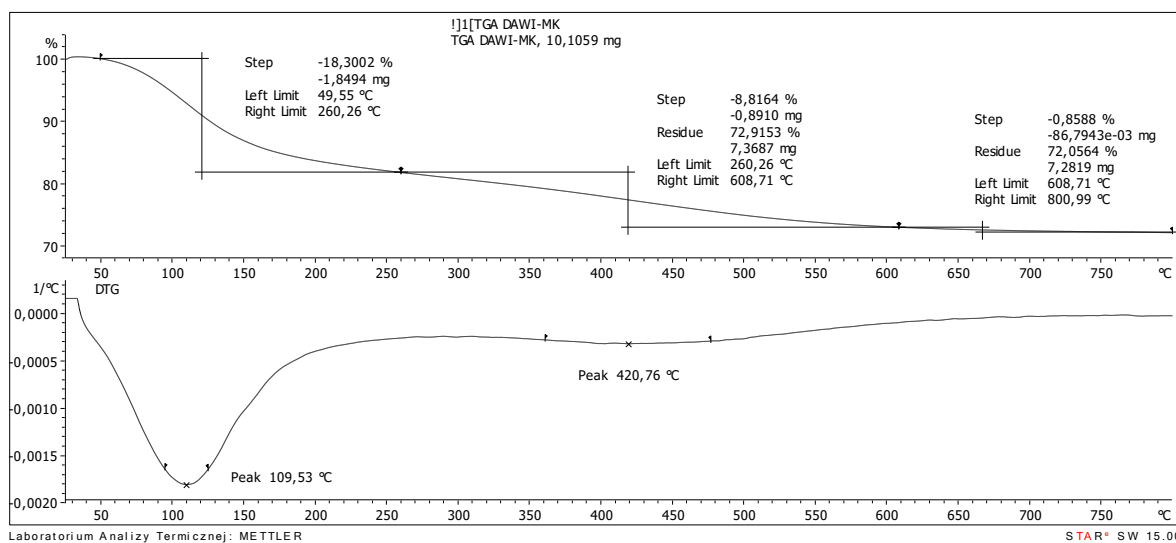

**Fig. S5. TG/DTG analysis of MgO · SiO<sub>2</sub>.**

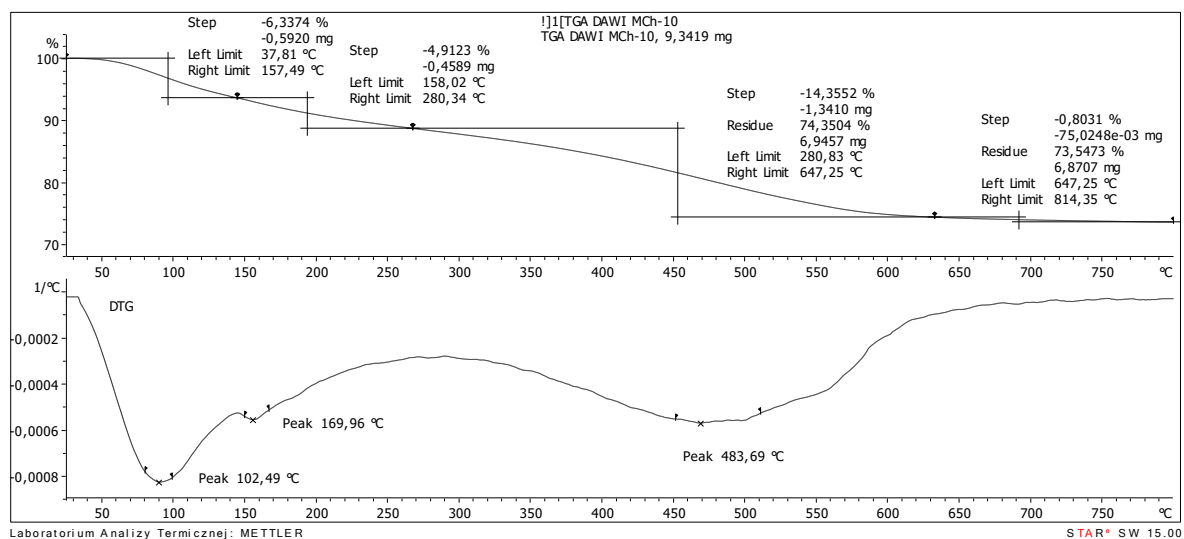

**Fig. S6. TG/DTG analysis of MgO · SiO<sub>2</sub> · C<sub>8</sub>.**

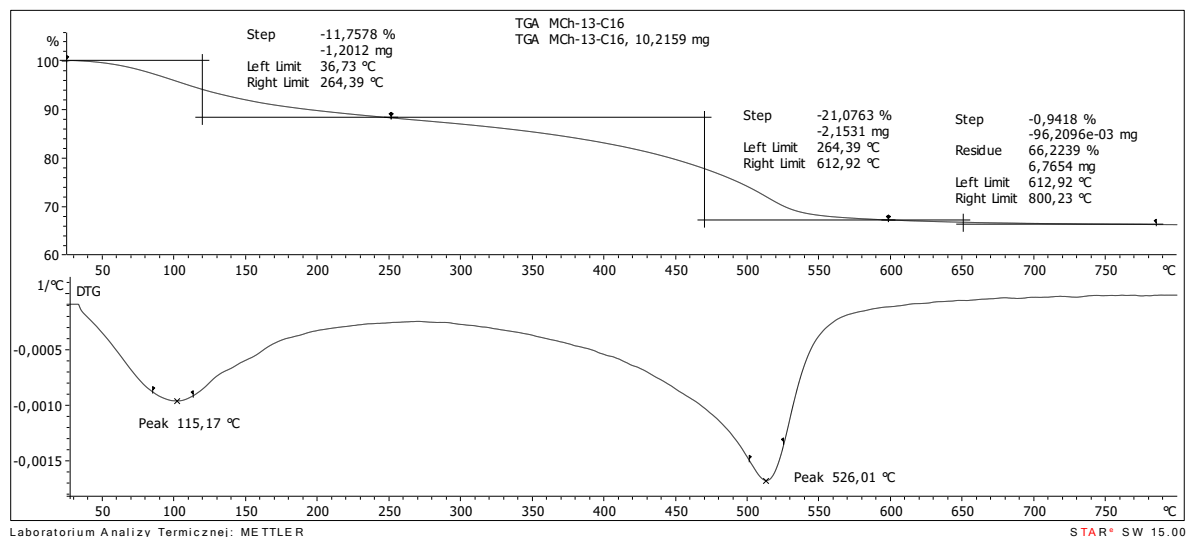

**Fig. S7. TG/DTG analysis of MgO · SiO<sub>2</sub> · C<sub>16</sub>.**

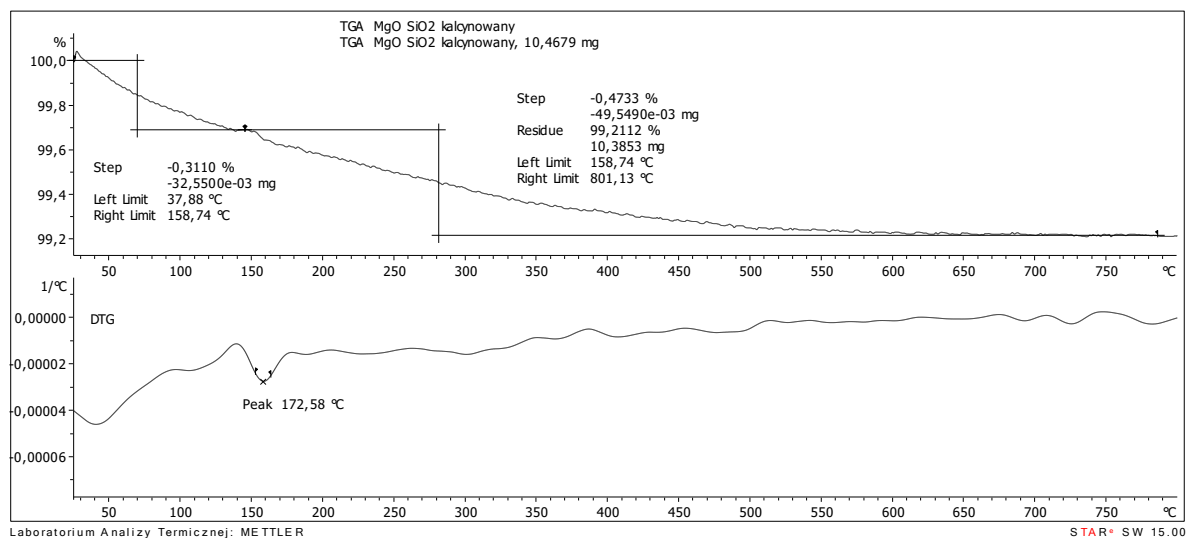

**Fig. S8.** TG/DTG analysis of  $\text{MgO} \cdot \text{SiO}_2(\text{calc.})$ .

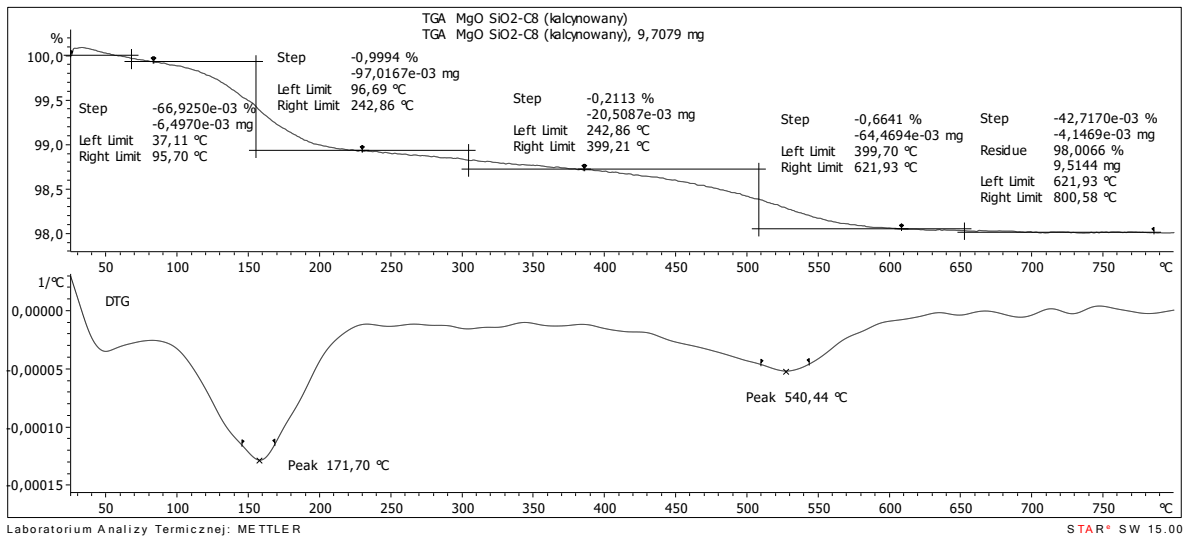

**Fig. S9.** TG/DTG analysis of  $\text{MgO} \cdot \text{SiO}_2(\text{calc.})\text{-C}_8$ .

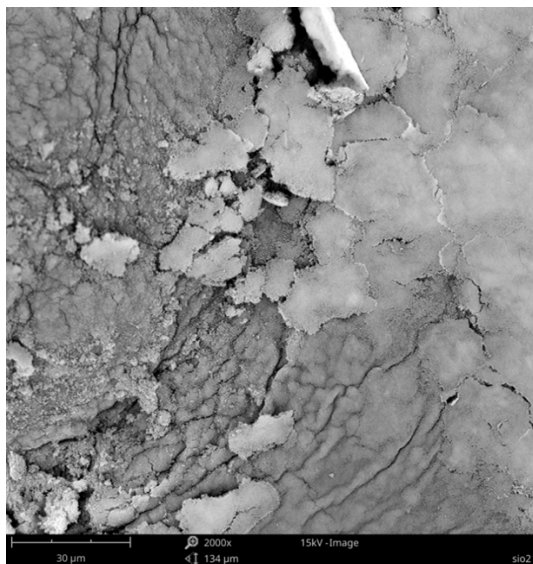

**Fig. S10.** SEM-EDS analysis  $\text{SiO}_2$ .

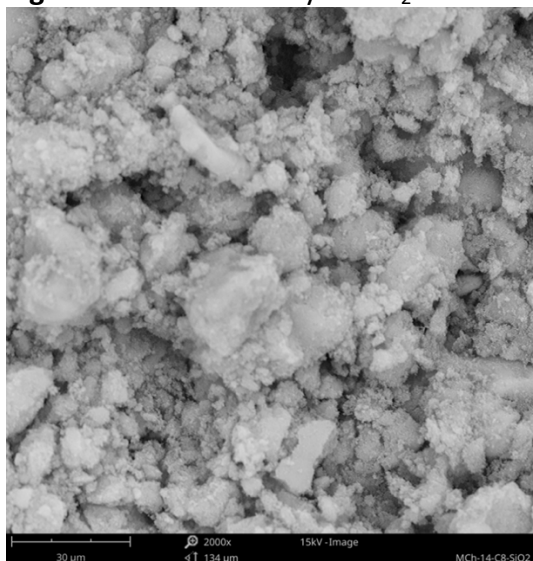

**Fig. S11.** SEM-EDS analysis  $\text{SiO}_2\text{-C}_8$ .

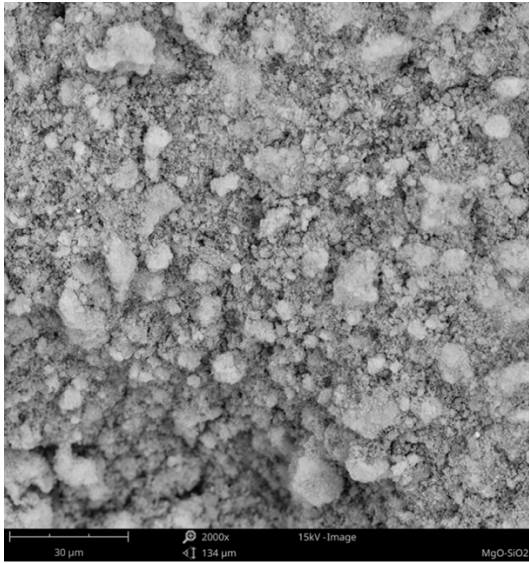

| Element Number | Element Symbol | Element Name | Atomic Conc. | Weight Conc. |
|----------------|----------------|--------------|--------------|--------------|
| 8              | O              | Oxygen       | 68.42        | 56.74        |
| 14             | Si             | Silicon      | 17.80        | 25.90        |
| 12             | Mg             | Magnesium    | 13.78        | 17.36        |

**Fig. S12.** SEM-EDS analysis  $\text{MgO}\cdot\text{SiO}_2$ .

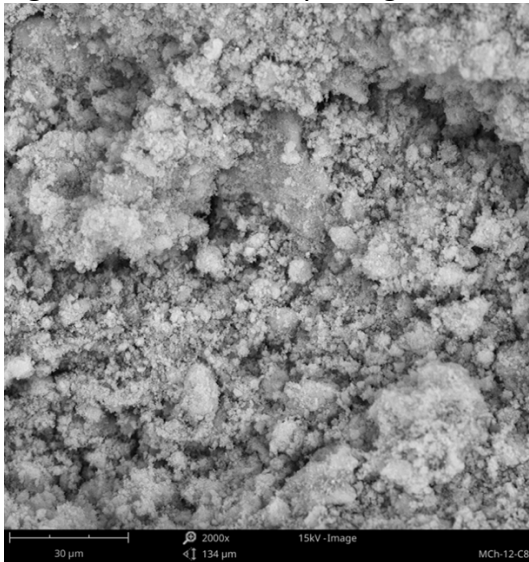

| Element Number | Element Symbol | Element Name | Atomic Conc. | Weight Conc. |
|----------------|----------------|--------------|--------------|--------------|
| 8              | O              | Oxygen       | 62.92        | 53.67        |
| 14             | Si             | Silicon      | 16.98        | 25.42        |
| 12             | Mg             | Magnesium    | 12.27        | 15.90        |
| 6              | C              | Carbon       | 7.83         | 5.01         |

**Fig. S13.** SEM-EDS analysis  $\text{MgO}\cdot\text{SiO}_2\text{-C}_8$ .

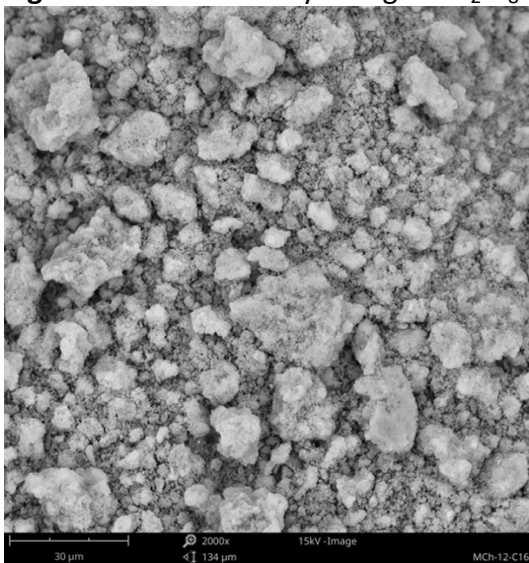

| Element Number | Element Symbol | Element Name | Atomic Conc. | Weight Conc. |
|----------------|----------------|--------------|--------------|--------------|
| 8              | O              | Oxygen       | 67.57        | 59.21        |
| 14             | Si             | Silicon      | 14.07        | 21.64        |
| 12             | Mg             | Magnesium    | 10.52        | 14.00        |
| 6              | C              | Carbon       | 7.84         | 5.16         |

**Fig. S14.** SEM-EDS analysis  $\text{MgO}\cdot\text{SiO}_2\text{-C}_{16}$ .

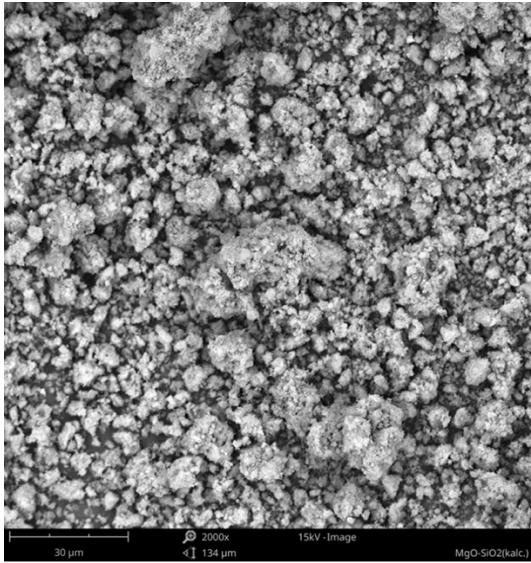

| Element Number | Element Symbol | Element Name | Atomic Conc. | Weight Conc. |
|----------------|----------------|--------------|--------------|--------------|
| 8              | O              | Oxygen       | 54.43        | 41.83        |
| 14             | Si             | Silicon      | 27.34        | 36.88        |
| 12             | Mg             | Magnesium    | 18.24        | 21.29        |

**Fig. S15.** SEM-EDS analysis  $\text{MgO}\cdot\text{SiO}_2(\text{calc.})$ .

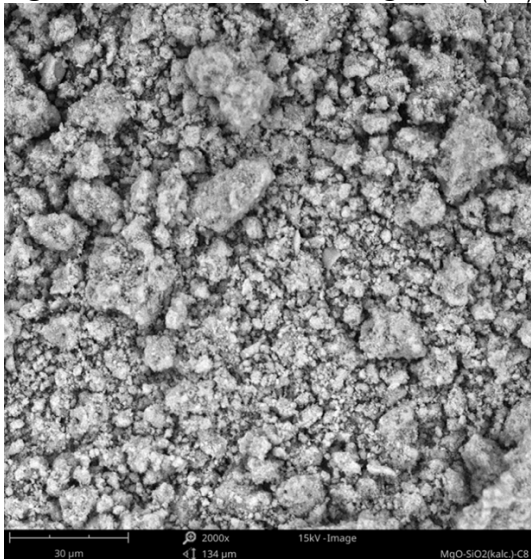

| Element Number | Element Symbol | Element Name | Atomic Conc. | Weight Conc. |
|----------------|----------------|--------------|--------------|--------------|
| 8              | O              | Oxygen       | 65.28        | 56.13        |
| 14             | Si             | Silicon      | 15.10        | 22.80        |
| 12             | Mg             | Magnesium    | 12.72        | 16.61        |
| 6              | C              | Carbon       | 6.90         | 4.46         |

**Fig. S16.** SEM-EDS analysis  $\text{MgO}\cdot\text{SiO}_2(\text{calc.})\text{-C}_8$ .

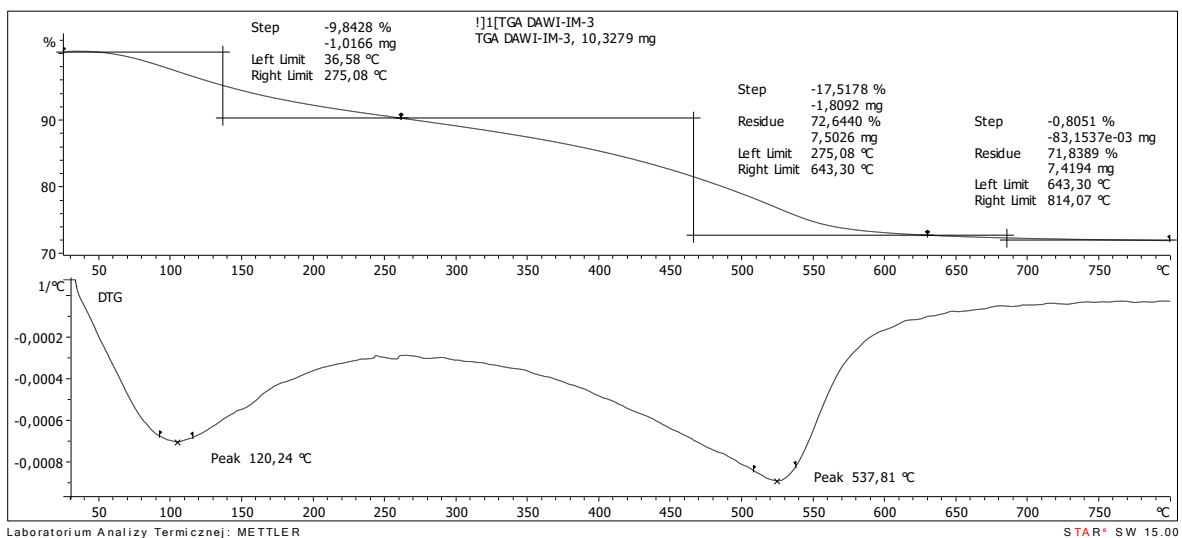

**Fig. S17.** TG/DTG analysis of  $\text{MgO}\cdot\text{SiO}_2\text{-C}_8\text{-LAO}$ .

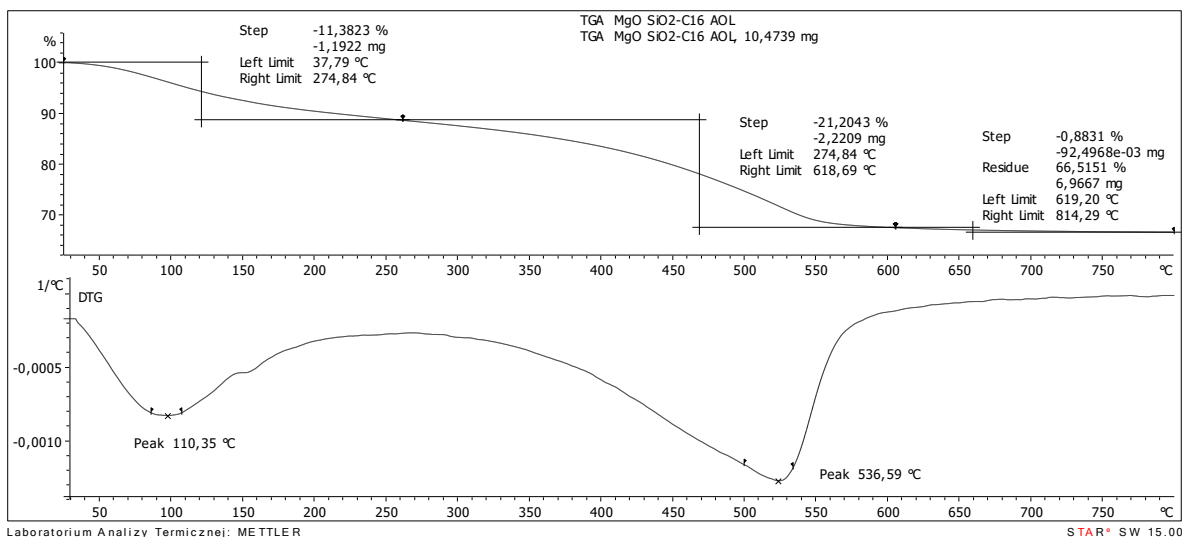

Fig. S18. TG/DTG analysis of MgO · SiO<sub>2</sub>-C<sub>16</sub>-LAO.

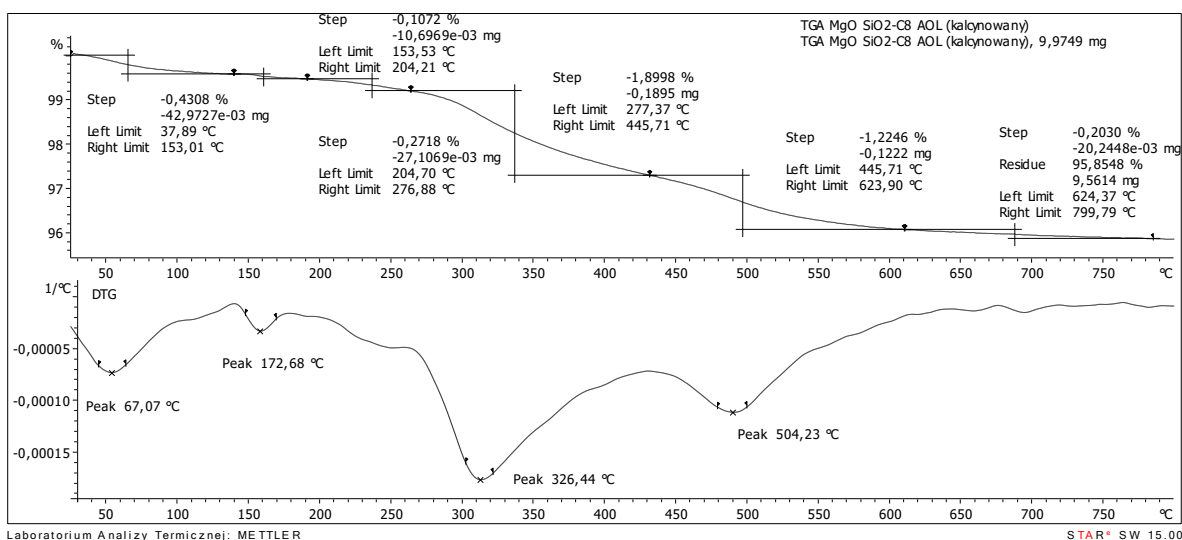

Fig. S19. TG/DTG analysis of MgO · SiO<sub>2</sub>(calc.)-C<sub>8</sub>-LAO.

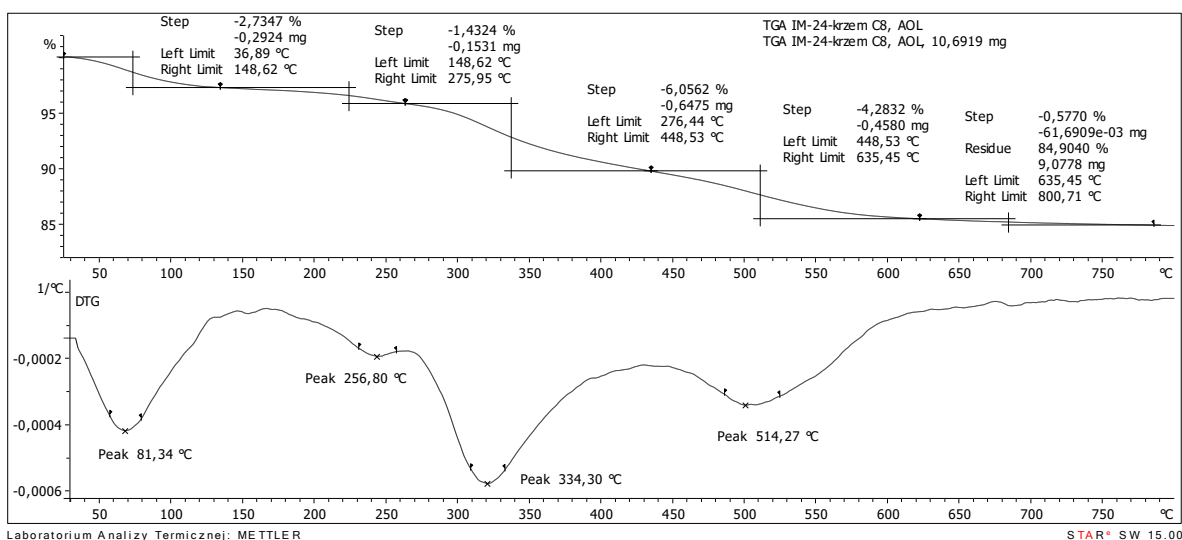

Fig. S20. TG/DTG analysis of SiO<sub>2</sub>-C<sub>8</sub>-LAO.



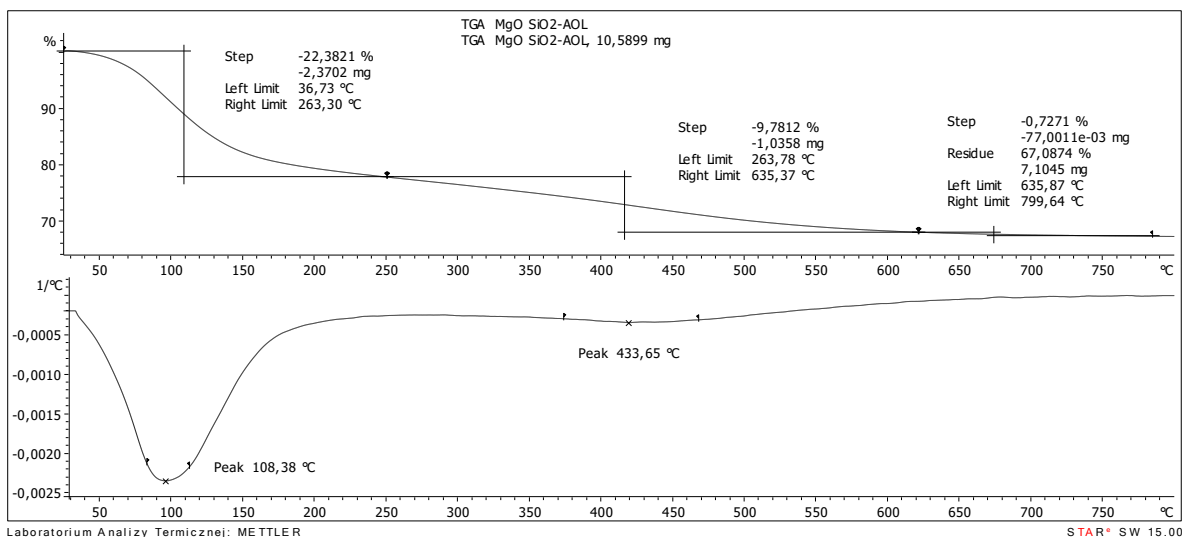

Fig. S21. TG/DTG analysis of MgO · SiO<sub>2</sub>-LAO.

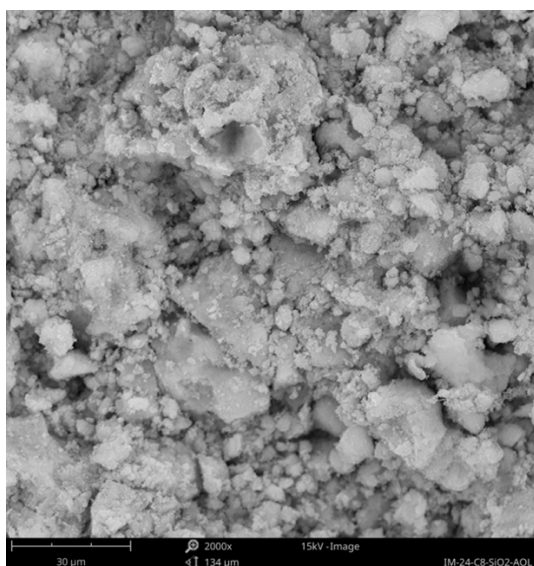

| Element Number | Element Symbol | Element Name | Atomic Conc. | Weight Conc. |
|----------------|----------------|--------------|--------------|--------------|
| 8              | O              | Oxygen       | 66.04        | 58.09        |
| 14             | Si             | Silicon      | 21.39        | 33.03        |
| 6              | C              | Carbon       | 8.53         | 5.63         |
| 7              | N              | Nitrogen     | 3.61         | 2.78         |
| 9              | F              | Fluorine     | 0.41         | 0.43         |
| 16             | S              | Sulfur       | 0.02         | 0.04         |

Fig. S22. SEM-EDS analysis of SiO<sub>2</sub>-LAO.

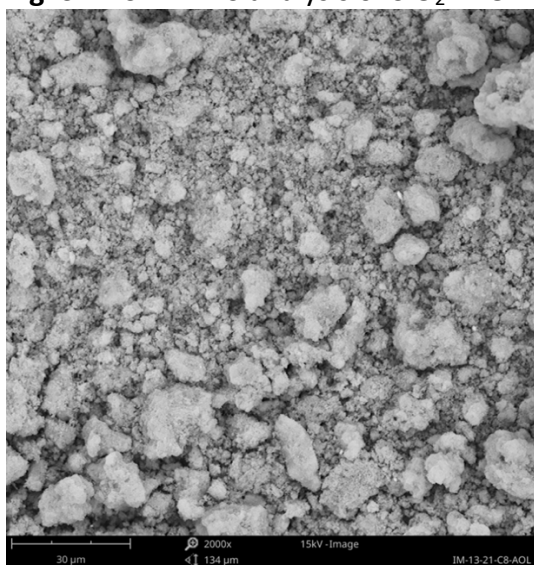

| Element Number | Element Symbol | Element Name | Atomic Conc. | Weight Conc. |
|----------------|----------------|--------------|--------------|--------------|
| 8              | O              | Oxygen       | 69.29        | 60.30        |
| 14             | Si             | Silicon      | 13.34        | 20.38        |
| 12             | Mg             | Magnesium    | 11.34        | 14.99        |
| 6              | C              | Carbon       | 3.85         | 2.52         |
| 7              | N              | Nitrogen     | 1.81         | 1.38         |
| 9              | F              | Fluorine     | 0.29         | 0.30         |
| 15             | P              | Phosphorus   | 0.06         | 0.10         |
| 16             | S              | Sulfur       | 0.02         | 0.04         |

Fig. S23. SEM-EDS analysis of MgO·SiO<sub>2</sub>-C<sub>8</sub>-LAO.

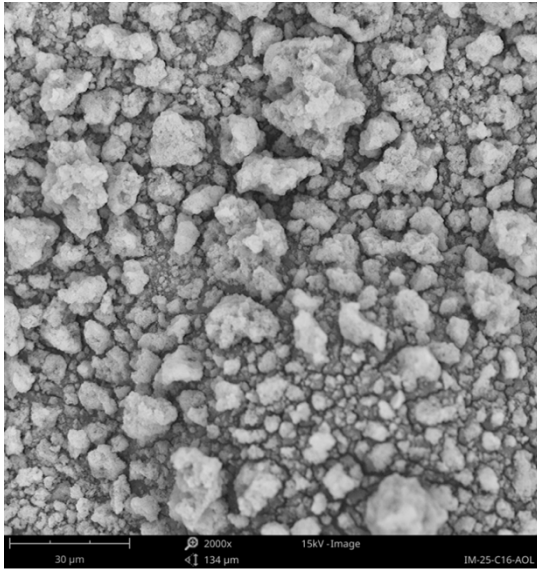

| Element Number | Element Symbol | Element Name | Atomic Conc. | Weight Conc. |
|----------------|----------------|--------------|--------------|--------------|
| 8              | O              | Oxygen       | 65.74        | 58.63        |
| 14             | Si             | Silicon      | 12.23        | 19.15        |
| 12             | Mg             | Magnesium    | 10.33        | 14.00        |
| 6              | C              | Carbon       | 9.52         | 6.38         |
| 7              | N              | Nitrogen     | 1.79         | 1.39         |
| 9              | F              | Fluorine     | 0.32         | 0.33         |
| 15             | P              | Phosphorus   | 0.04         | 0.06         |
| 16             | S              | Sulfur       | 0.03         | 0.05         |

**Fig. S24.** SEM-EDS analysis of MgO·SiO<sub>2</sub>-C<sub>16</sub>-LAO.

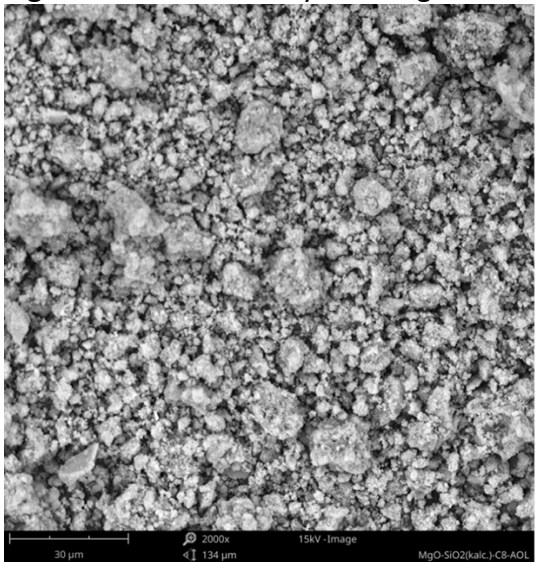

| Element Number | Element Symbol | Element Name | Atomic Conc. | Weight Conc. |
|----------------|----------------|--------------|--------------|--------------|
| 8              | O              | Oxygen       | 60.27        | 53.24        |
| 14             | Si             | Silicon      | 13.79        | 21.38        |
| 12             | Mg             | Magnesium    | 11.33        | 15.21        |
| 6              | C              | Carbon       | 10.12        | 6.71         |
| 7              | N              | Nitrogen     | 4.49         | 3.47         |

**Fig. S25.** SEM-EDS analysis of MgO·SiO<sub>2</sub>(calc.)-C<sub>8</sub>-LAO.

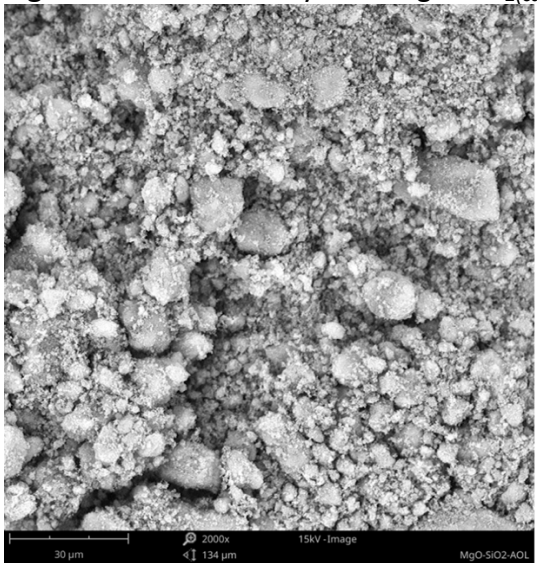

| Element Number | Element Symbol | Element Name | Atomic Conc. | Weight Conc. |
|----------------|----------------|--------------|--------------|--------------|
| 8              | O              | Oxygen       | 56.58        | 48.77        |
| 14             | Si             | Silicon      | 17.52        | 26.51        |
| 12             | Mg             | Magnesium    | 11.12        | 14.56        |
| 6              | C              | Carbon       | 9.19         | 5.94         |
| 7              | N              | Nitrogen     | 5.59         | 4.22         |

**Fig. S26.** SEM-EDS analysis of MgO·SiO<sub>2</sub>-LAO.

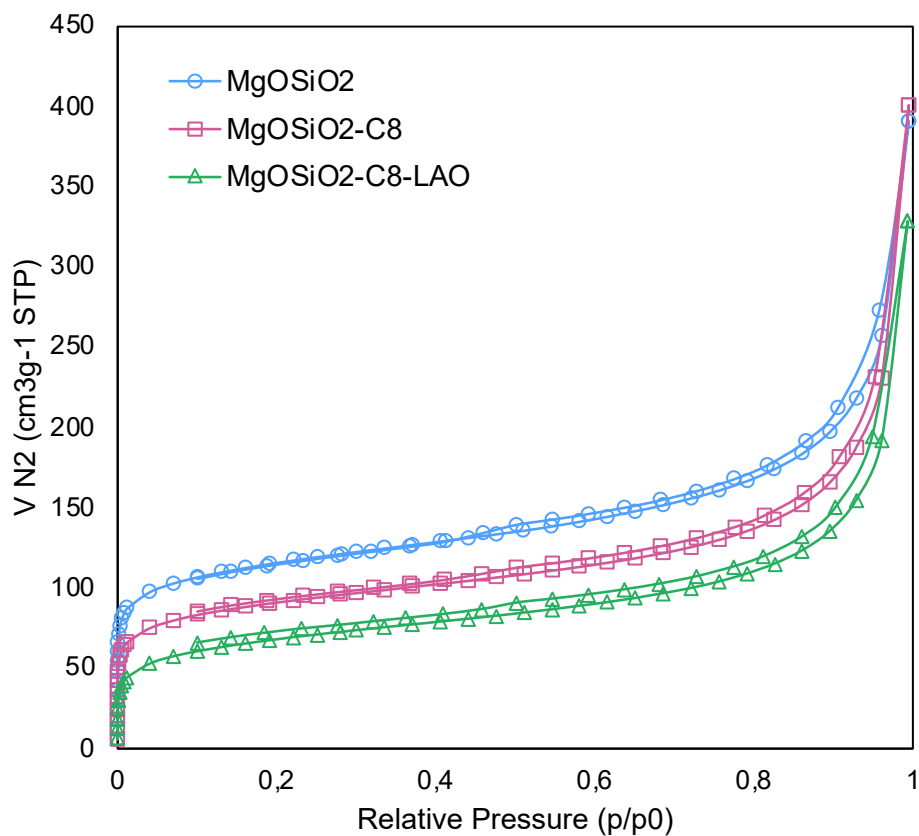

**Fig. S27.** Adsorption-desorption isotherms of  $\text{MgO}\cdot\text{SiO}_2$ ,  $\text{MgO}\cdot\text{SiO}_2\text{-C}_8$ ,  $\text{MgO}\cdot\text{SiO}_2\text{-C}_8\text{-LAO}$ .

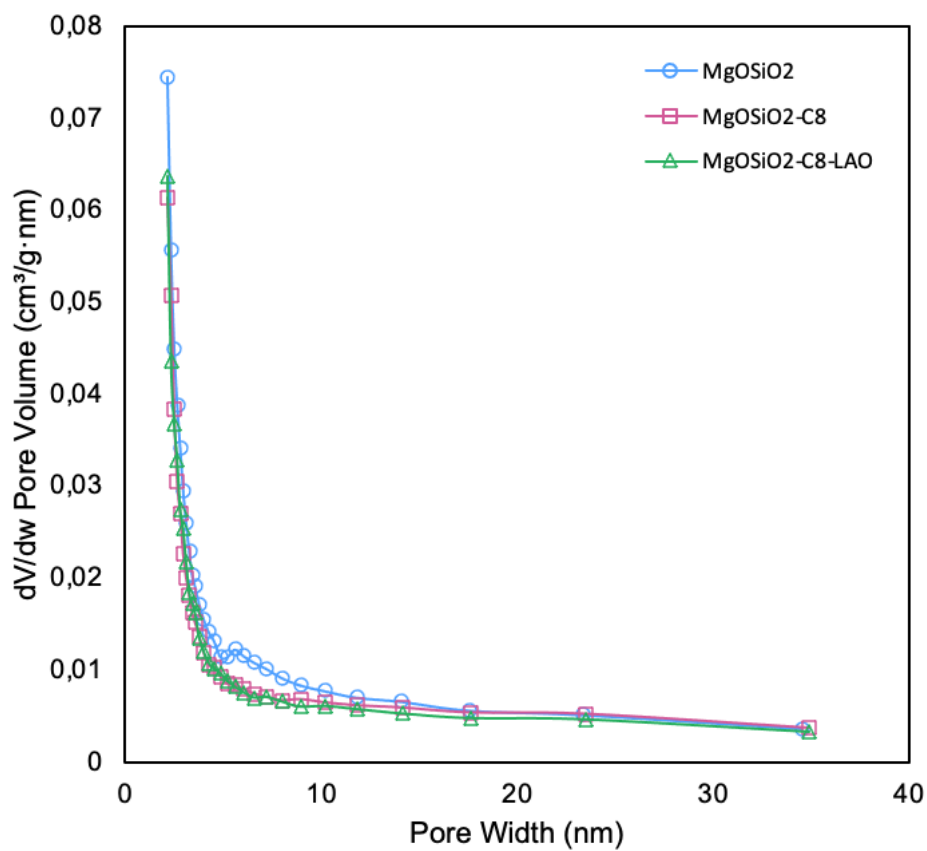

**Fig. S28.** Pore size distributions of  $\text{MgO}\cdot\text{SiO}_2$ ,  $\text{MgO}\cdot\text{SiO}_2\text{-C}_8$ ,  $\text{MgO}\cdot\text{SiO}_2\text{-C}_8\text{-LAO}$ .

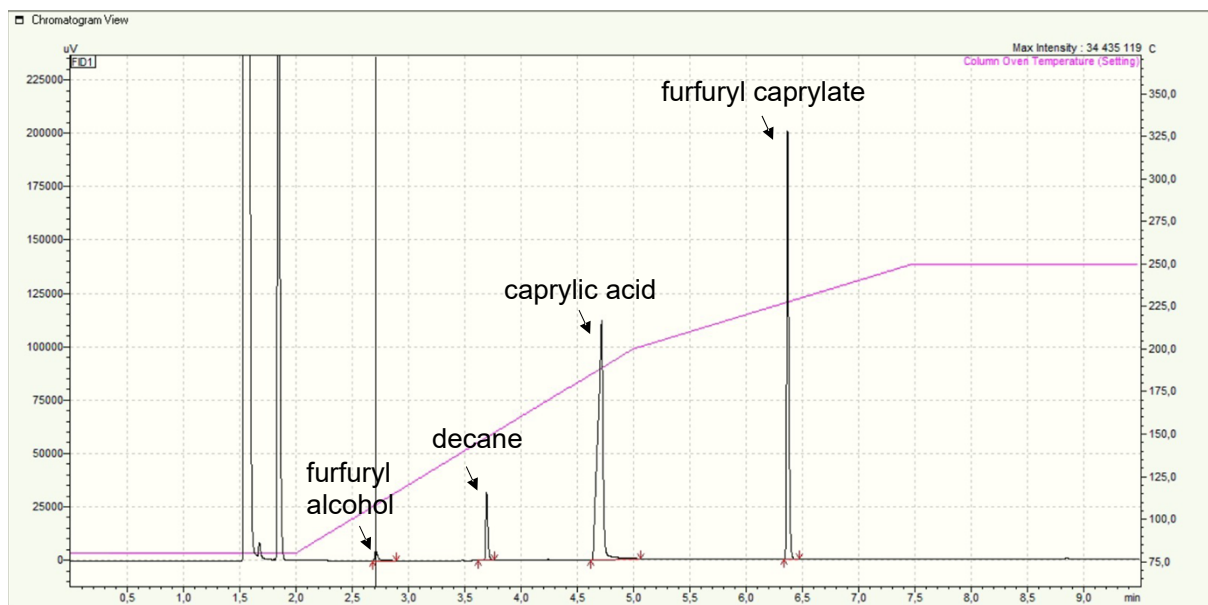

**Fig. S29.** Chromatogram GC analysis of esterification of furfuryl alcohol and caprylic acid.

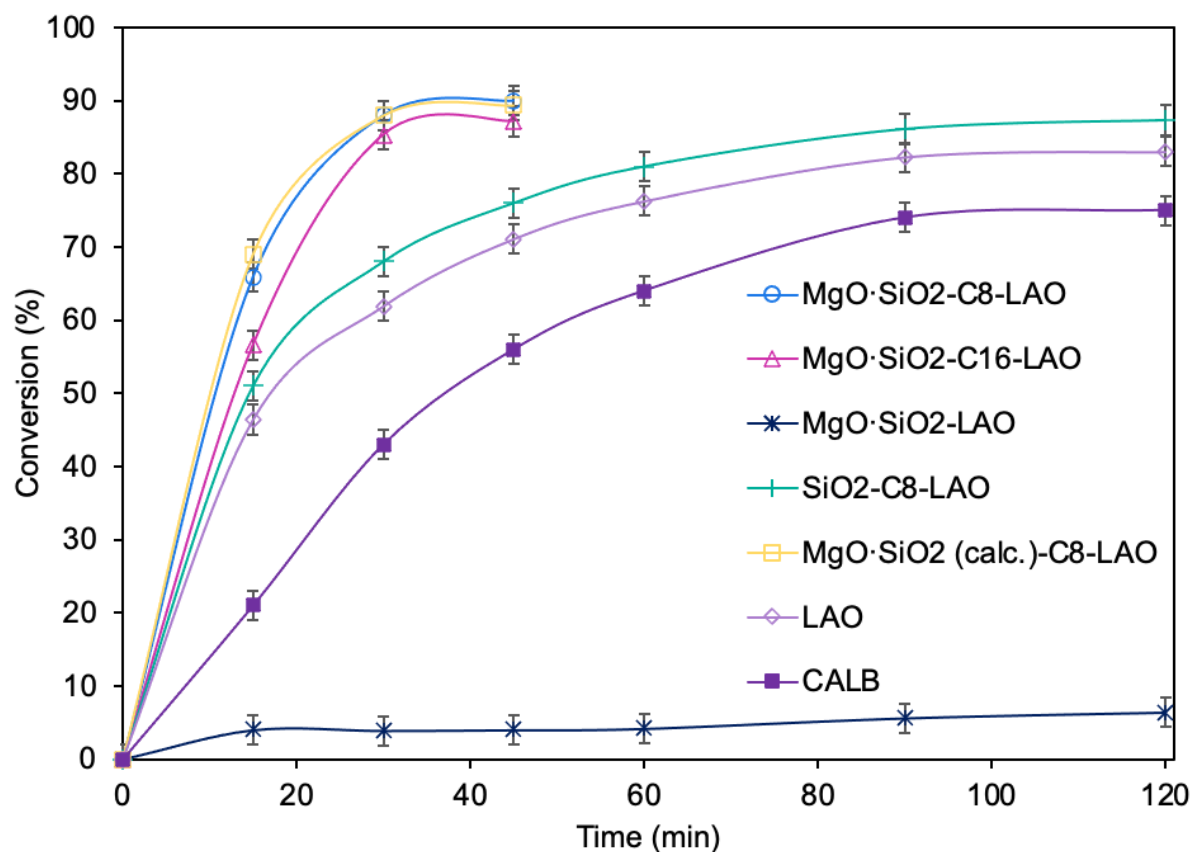

**Fig. S30.** The influence of siliceous support modification on biocatalyst performance on furfuryl alcohol esterification.

*Reaction conditions:* furfuryl alcohol 1.0 mmol, caprylic acid 3.0 mmol, cyclohexane 0.5 mL, biocatalyst containing 6.36 mg of LAO, (146  $\mu\text{L}$  of LAO solution ( $43.7 \text{ mg mL}^{-1}$ ); 530  $\mu\text{L}$  of CALB solution ( $12 \text{ mg mL}^{-1}$ ); 300 mg of  $\text{MgO}\cdot\text{SiO}_2\text{-LAO}$ ; 69 mg of  $\text{SiO}_2\text{-C}_8\text{-LAO}$ ; 150 mg of  $\text{MgO}\cdot\text{SiO}_2\text{-C}_8\text{-LAO}$ ; 294 mg of  $\text{MgO}\cdot\text{SiO}_2(\text{calc})\text{-C}_8\text{-LAO}$ ; 413 mg of  $\text{MgO}\cdot\text{SiO}_2\text{-C}_{16}\text{-LAO}$ ); 25°C, 250 rpm; determined using GC).

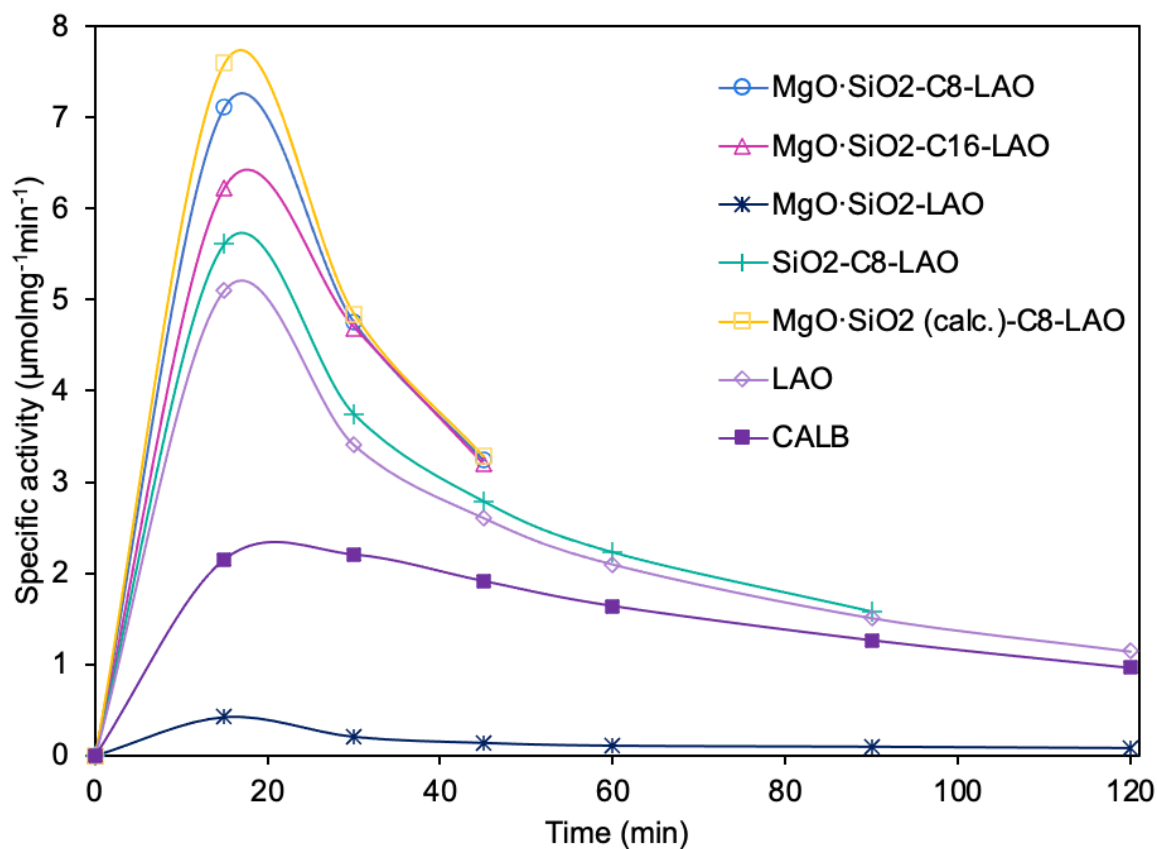

**Fig. S31.** The influence of siliceous support modification on biocatalyst performance on furfuryl alcohol esterification.

*Reaction conditions:* furfuryl alcohol 1.0 mmol, caprylic acid 3.0 mmol, cyclohexane 0.5 mL, biocatalyst containing 6.36 mg of LAO, (146  $\mu\text{L}$  of LAO solution ( $43.7 \text{ mg mL}^{-1}$ ); 530  $\mu\text{L}$  of CALB solution ( $12 \text{ mg mL}^{-1}$ ); 300 mg of  $\text{MgO}\cdot\text{SiO}_2\text{-LAO}$ ; 69 mg of  $\text{SiO}_2\text{-C}_8\text{-LAO}$ ; 150 mg of  $\text{MgO}\cdot\text{SiO}_2\text{-C}_8\text{-LAO}$ ; 294 mg of  $\text{MgO}\cdot\text{SiO}_2(\text{calc})\text{-C}_8\text{-LAO}$ ; 413 mg of  $\text{MgO}\cdot\text{SiO}_2\text{-C}_{16}\text{-LAO}$ ),  $25^\circ\text{C}$ , 250 rpm; determined using GC).

**Fig. S32.** TG/DTG analysis of  $\text{MgO}\cdot\text{SiO}_2\text{-C}_8\text{-LAO}$  after recycling.

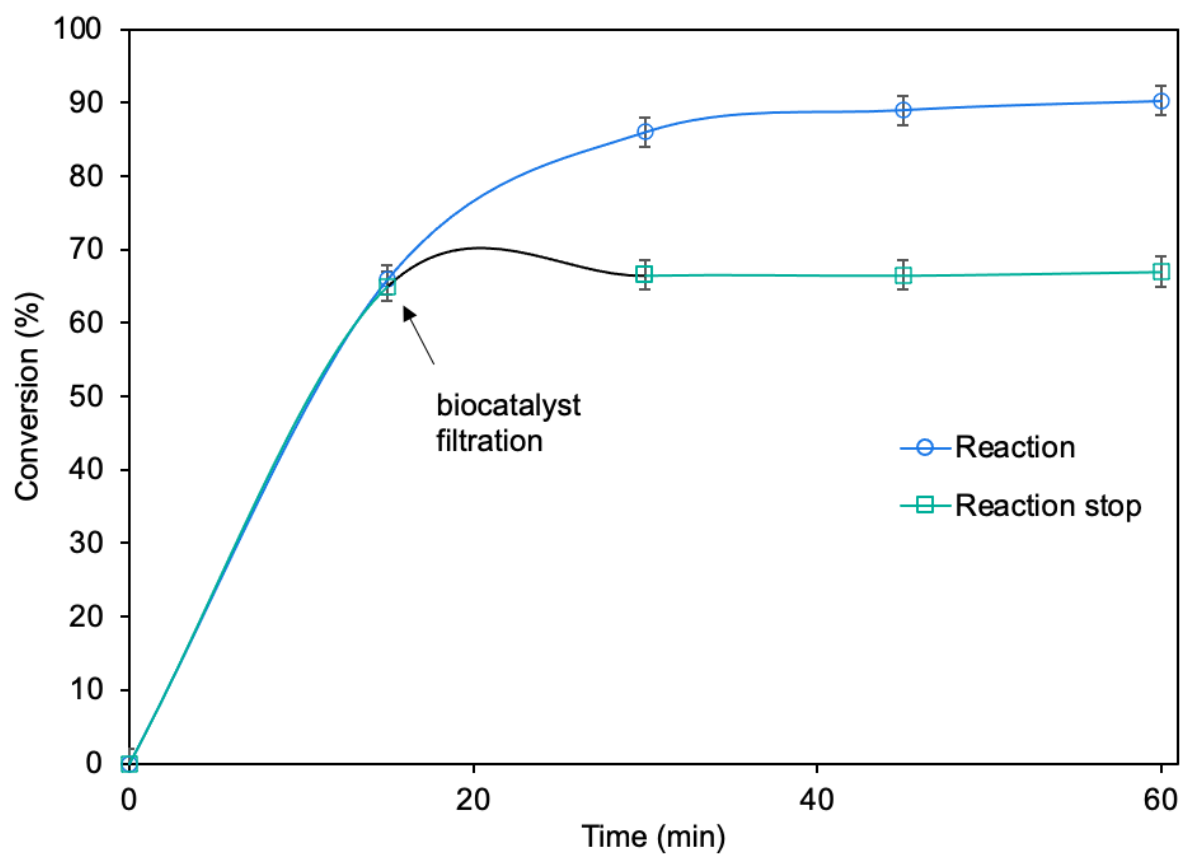

**Fig. S33.** Fast biocatalyst filtration from reaction mixture. “Reaction stop” experiment.

*Reaction conditions:* furfuryl alcohol 1.0 mmol, caprylic acid 3.0 mmol, cyclohexane 0.5 mL, biocatalyst (6.36 mg of lipase, e.g. 150 mg of MgO·SiO<sub>2</sub>-C<sub>8</sub>-LAO), 25°C, 250 rpm.

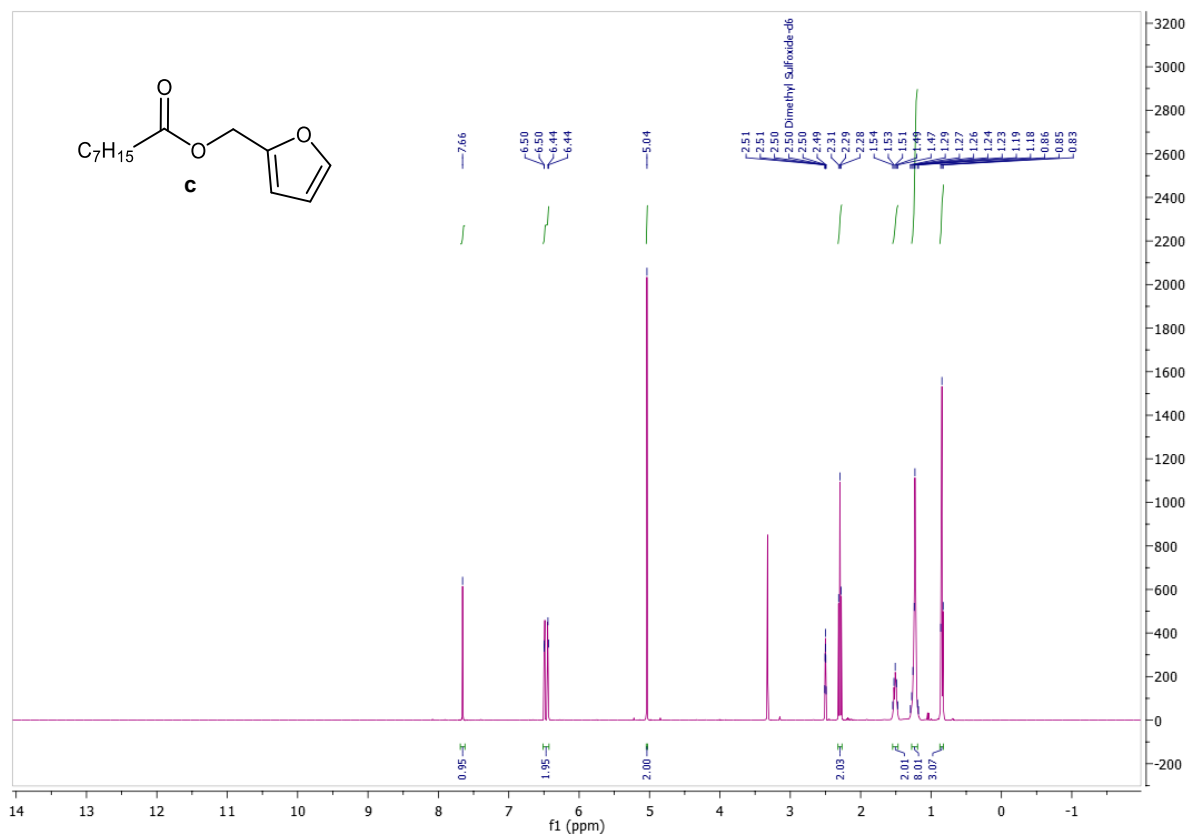

**Fig. S34.**  $^1\text{H}$  NMR spectra of furfuryl caprylate (c).

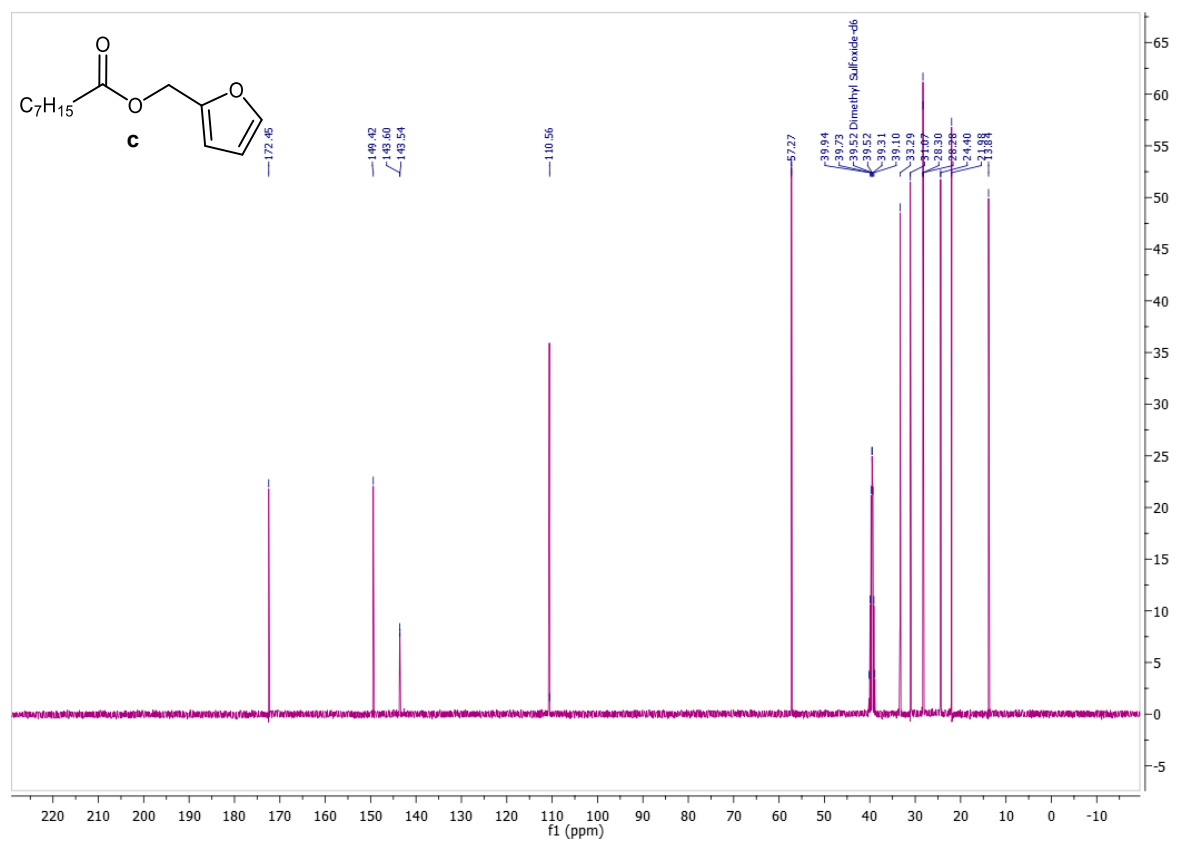

**Fig. S35.**  $^{13}\text{C}$  NMR spectra of furfuryl caprylate (c).

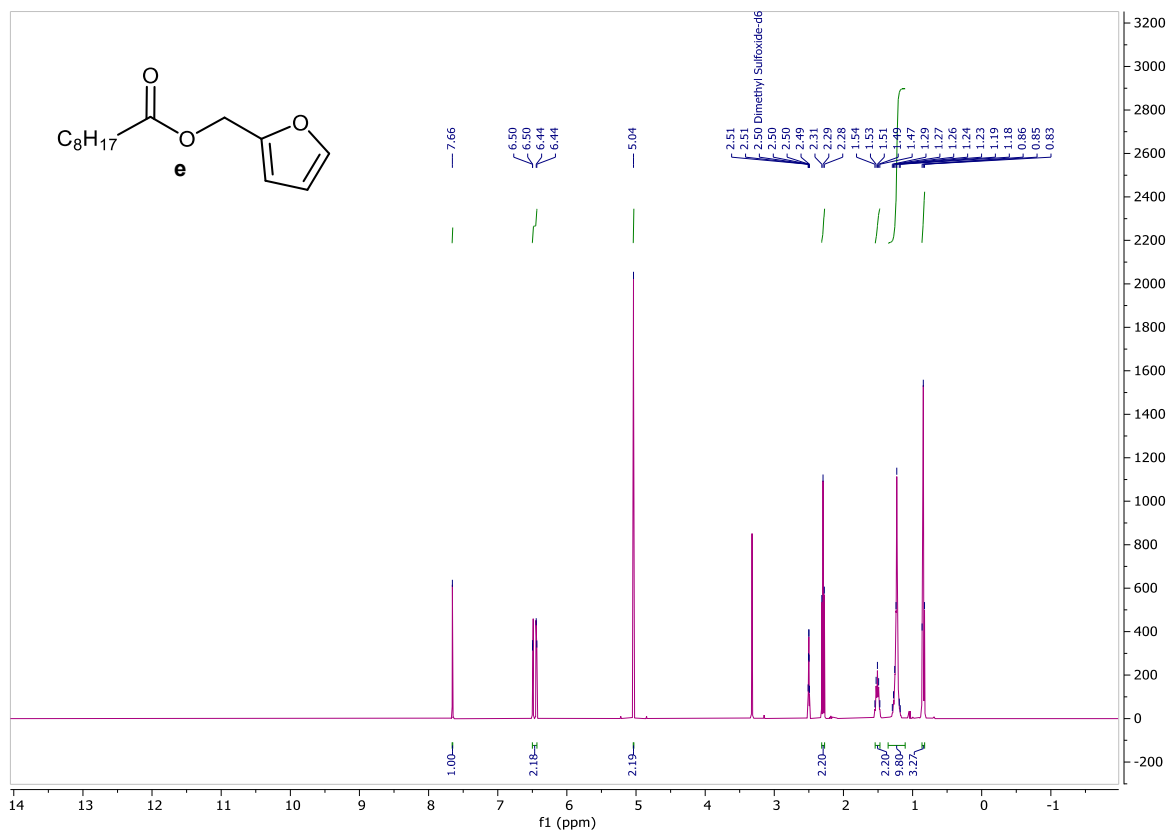

Fig. S36. <sup>1</sup>H NMR spectra of furfuryl nonanoate (e).

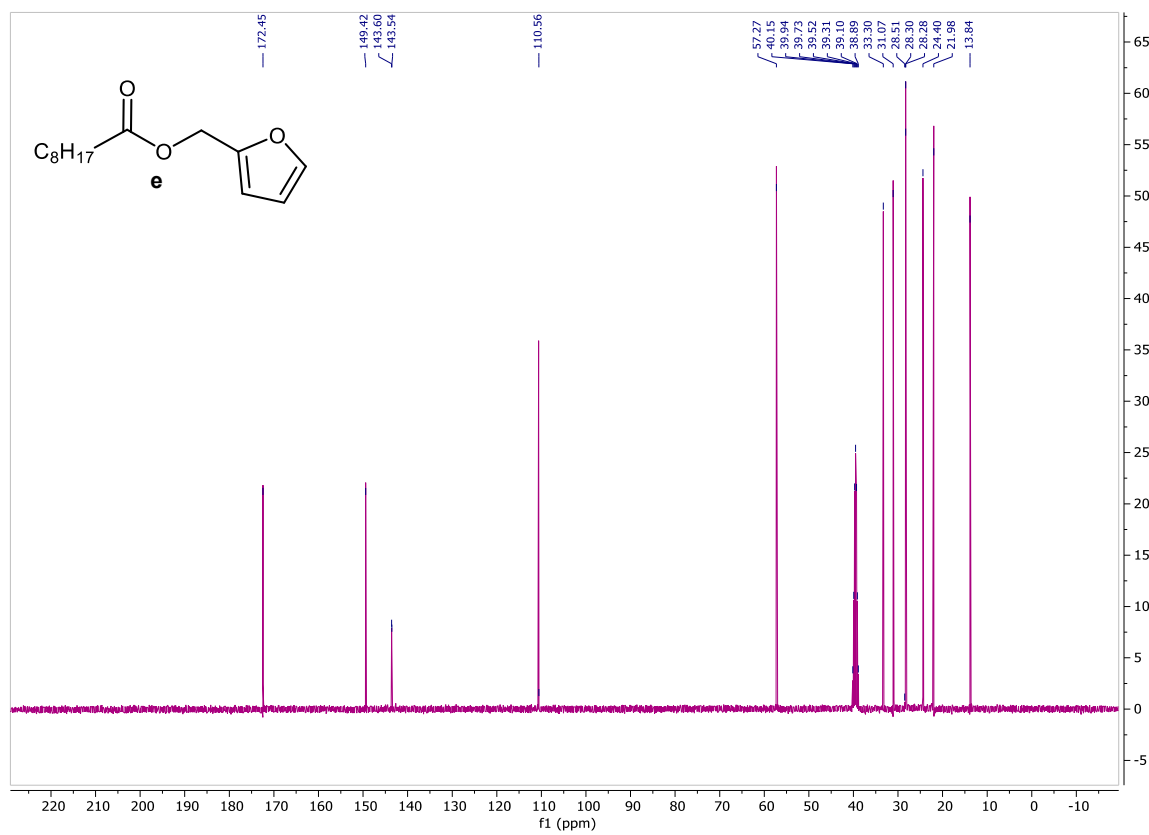

Fig. S37. <sup>13</sup>C NMR spectra of furfuryl nonanoate (e).



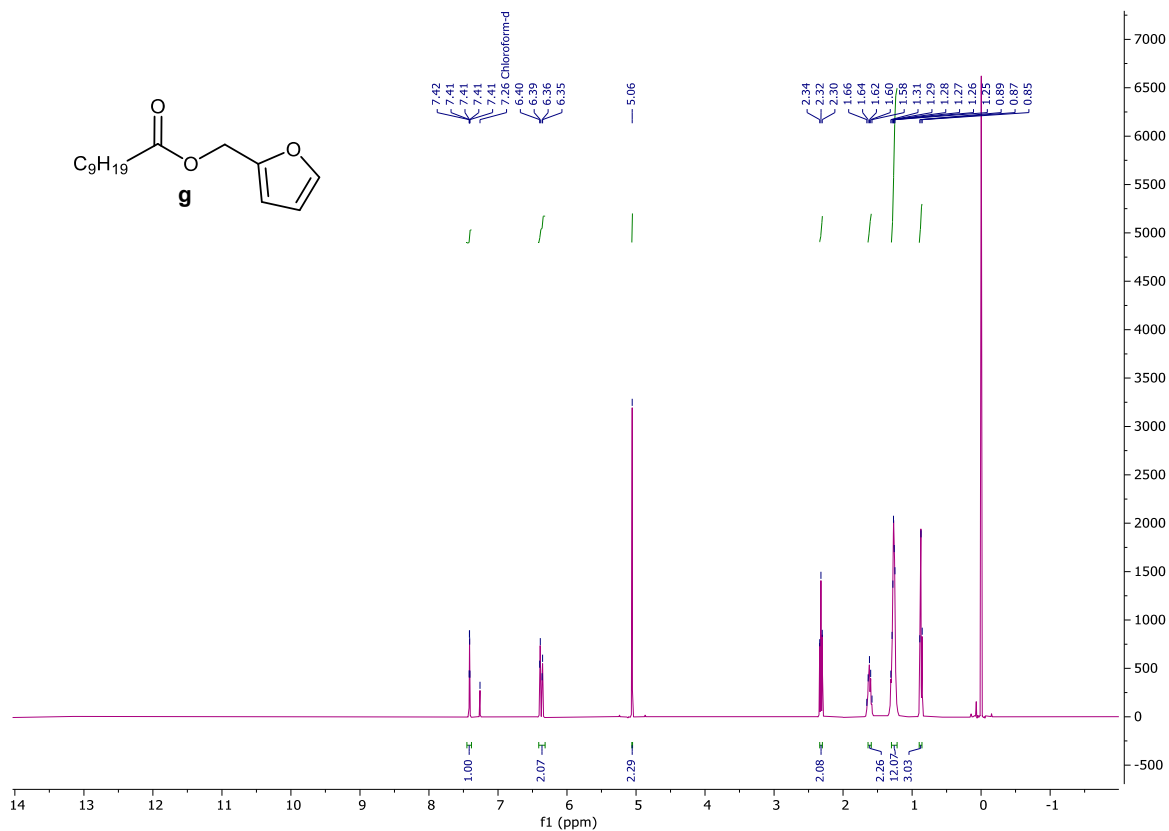

**Fig. S38.** <sup>1</sup>H NMR spectra of furfuryl decanoate (g).

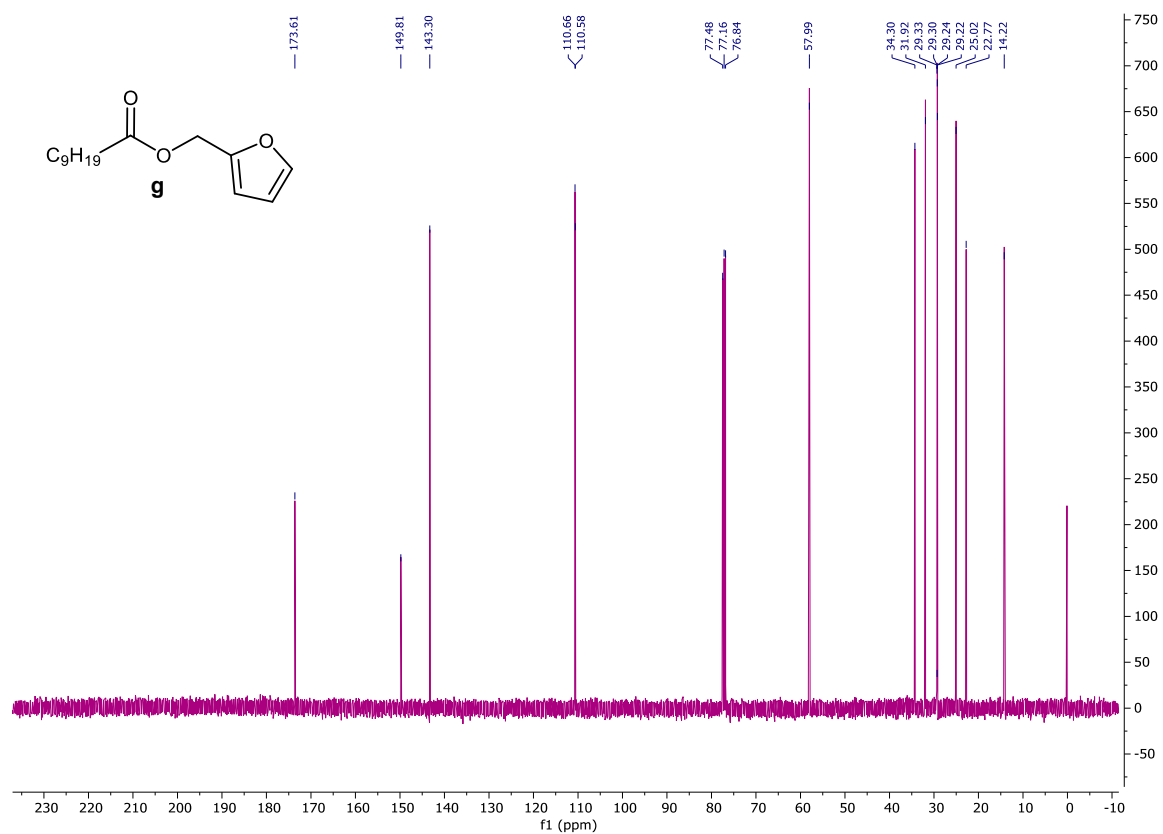

**Fig. S39.** <sup>13</sup>C NMR spectra of furfuryl decanoate (g).

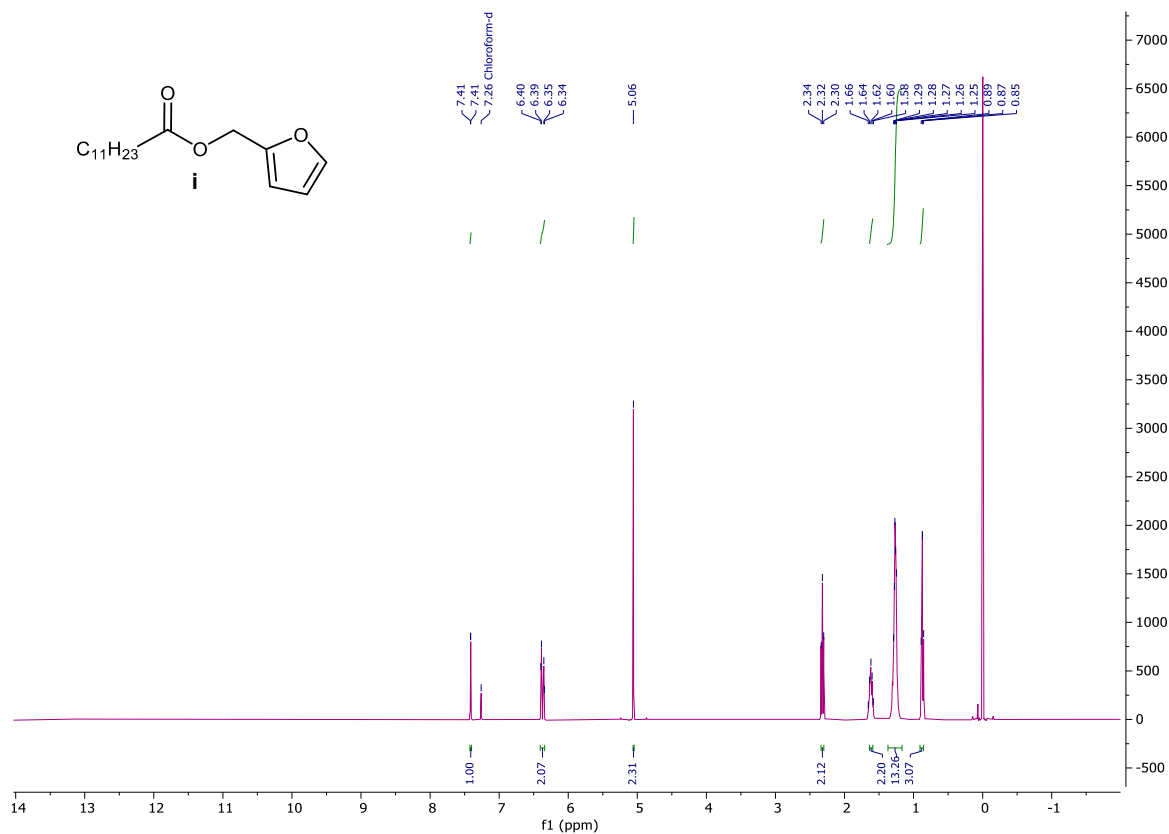

**Fig. S40.** <sup>1</sup>H NMR spectra of furfuryl laurate (i).

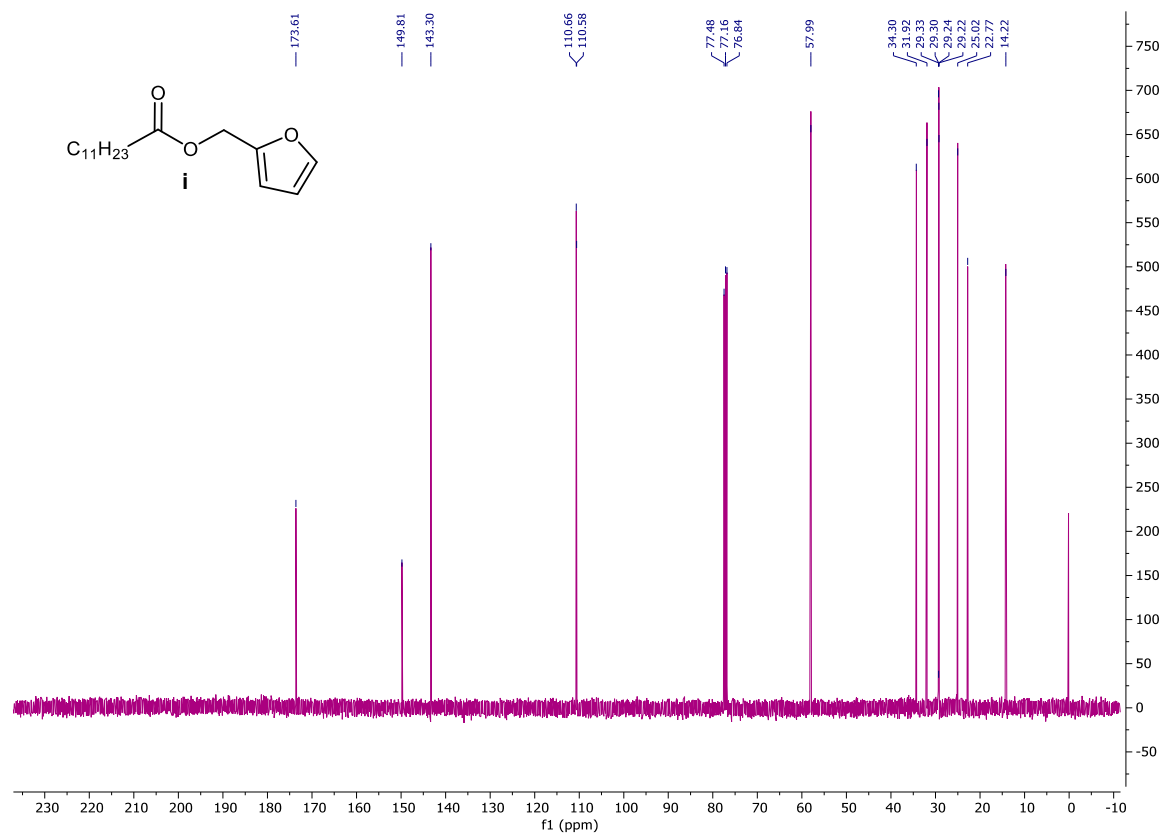

**Fig. S41.** <sup>13</sup>C NMR spectra of furfuryl laurate (i).

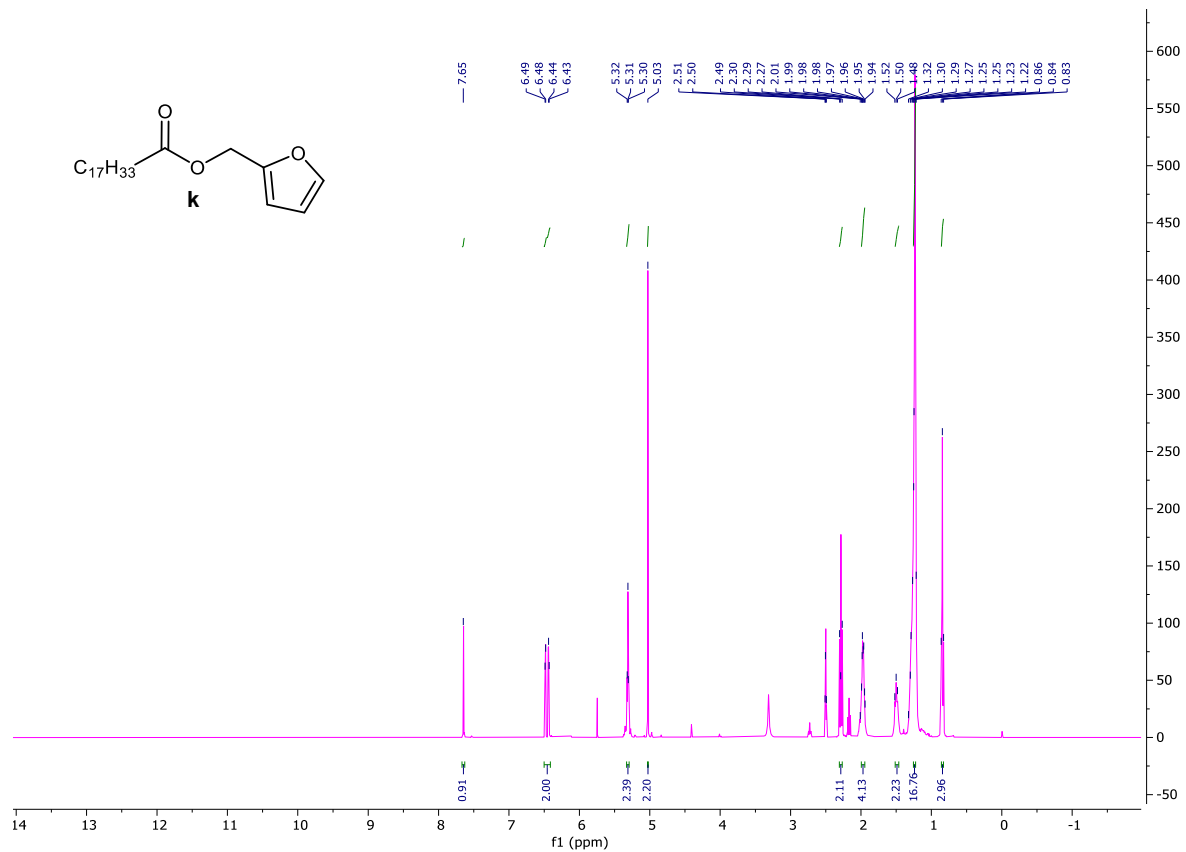

Fig. S42. <sup>1</sup>H NMR spectra of furfuryl oleate (k).

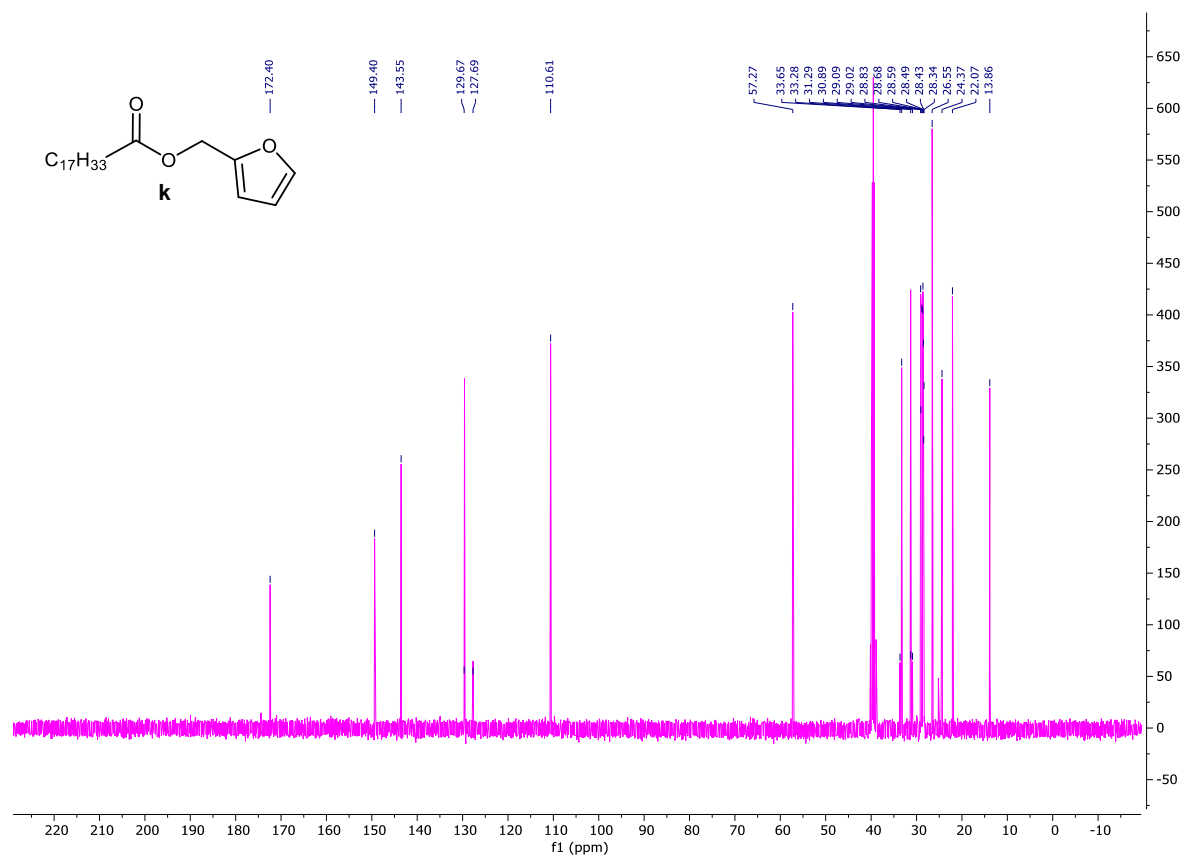

Fig. S43. <sup>13</sup>C NMR spectra of furfuryl oleate (k).
